# Supplementary material for: Tuning of hydrophobic–hydrophilic balance for the development of a salt-tolerant and protease-resistant lipopeptide AMP
Source: Royal Society of Chemistry journal article supplement (doi:10.1039/d3nj04815b), 2024-01-01
Supplement: d3nj04815b1.pdf [file d3nj04815b1.pdf]

## Supporting Information

### Tuning of Hydrophobic-Hydrophilic Balance for the Development of a Salt-Tolerant and Protease-Resistant Lipopeptide AMP

Monikha Chetia,<sup>1</sup> Tanumoy Sarkar,<sup>1</sup> Maitery Yadav<sup>1</sup>, Chandrima Dey,<sup>2</sup> Pradeep Kumar  
Sundaravadivelu,<sup>2</sup> Rajkumar Thummer,<sup>2</sup> Sunanda Chatterjee<sup>1\*</sup>

1. Department of Chemistry,  
Indian Institute of Technology, Guwahati,  
Guwahati, Assam-781039.
2. Department of Biosciences and Bioengineering,  
Indian Institute of Technology,  
Guwahati, Guwahati, Assam-781039.

Corresponding Author: Dr. Sunanda Chatterjee, Department of Chemistry, Indian Institute of  
Technology, Guwahati, IITG, Guwahati, Assam-781039. Email for correspondence:  
[sunanda.c@iitg.ac.in](mailto:sunanda.c@iitg.ac.in)

## Contents

| <b>Figures</b>                                                                                                | <b>Pages</b> |
|---------------------------------------------------------------------------------------------------------------|--------------|
| S1-S6. Analytical HPLC traces of <b>P8-P18</b>                                                                | <b>3-5</b>   |
| S7-S12. MALDI-MS spectra of <b>P8-P18</b>                                                                     | <b>6-9</b>   |
| S13-S18. <sup>1</sup> H NMR spectra of <b>P8-P18</b>                                                          | <b>10-15</b> |
| S19. FTIR spectra of <b>P8-P18</b>                                                                            | <b>16</b>    |
| S20. PXRD spectra of <b>P8-P18</b>                                                                            | <b>16</b>    |
| S21 Bar diagrams showing MIC <sub>99%</sub> of <b>P8- P18</b> in the absence of salt                          | <b>17</b>    |
| S22. Bar diagrams showing MIC <sub>99%</sub> of <b>P16 and P18</b> in the presence of salt                    | <b>17</b>    |
| S23. Time kinetics of the bactericidal activity of <b>P16</b> and <b>P18</b>                                  | <b>18</b>    |
| S24. Bar diagrams MTT assay of <b>P8, P10, P12, P14</b> on HEK 293 cells and<br><b>P16, P18</b> on HeLa cells | <b>19</b>    |
| S25. Microscopy images of <b>P16</b> and <b>P18</b> treated HEK293 cells                                      | <b>20</b>    |
| S26. Digital images and bar diagram for haemolytic assay                                                      | <b>21</b>    |
| S27. Growth curve of MRSA                                                                                     | <b>20</b>    |
| S28a-e. MALDI-MS analysis of enzymatic action on <b>P16</b>                                                   | <b>21-25</b> |
| S29a-e. MALDI-MS analysis of enzymatic action on <b>P18</b>                                                   | <b>26-30</b> |
| Table S1. 2θ and d-spacing values from PXRD                                                                   | <b>30</b>    |

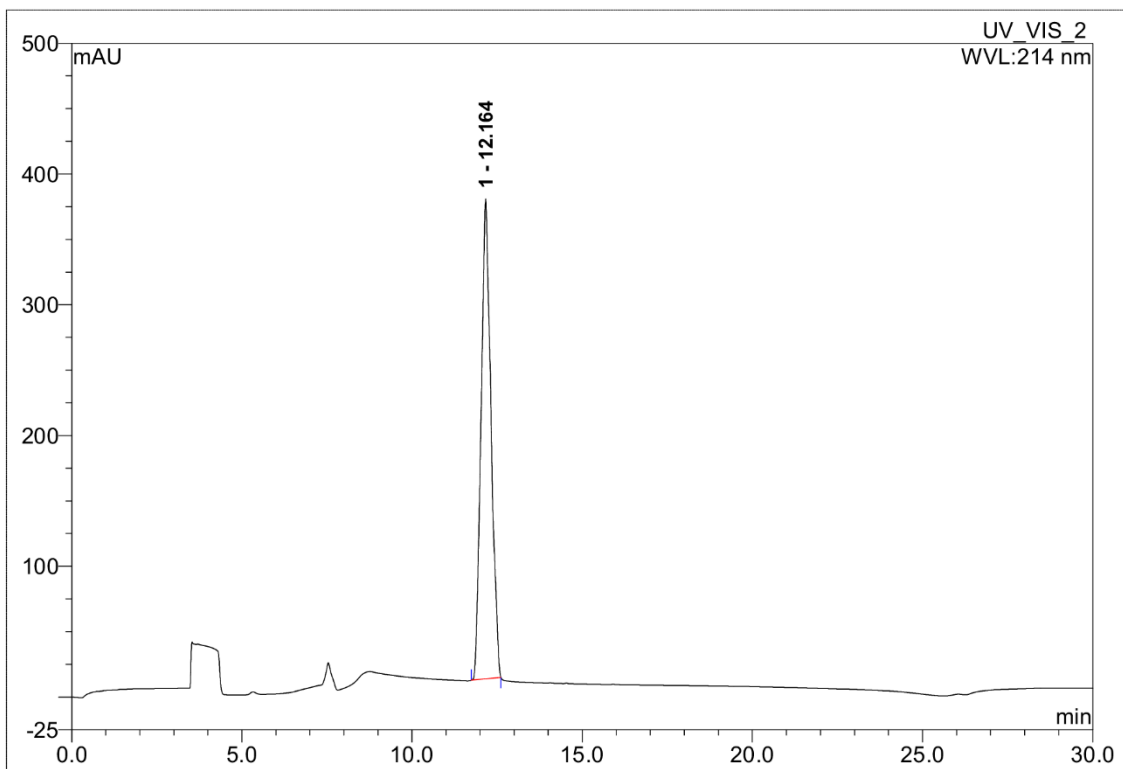

**Figure S1.** Analytical HPLC trace for **P8**.

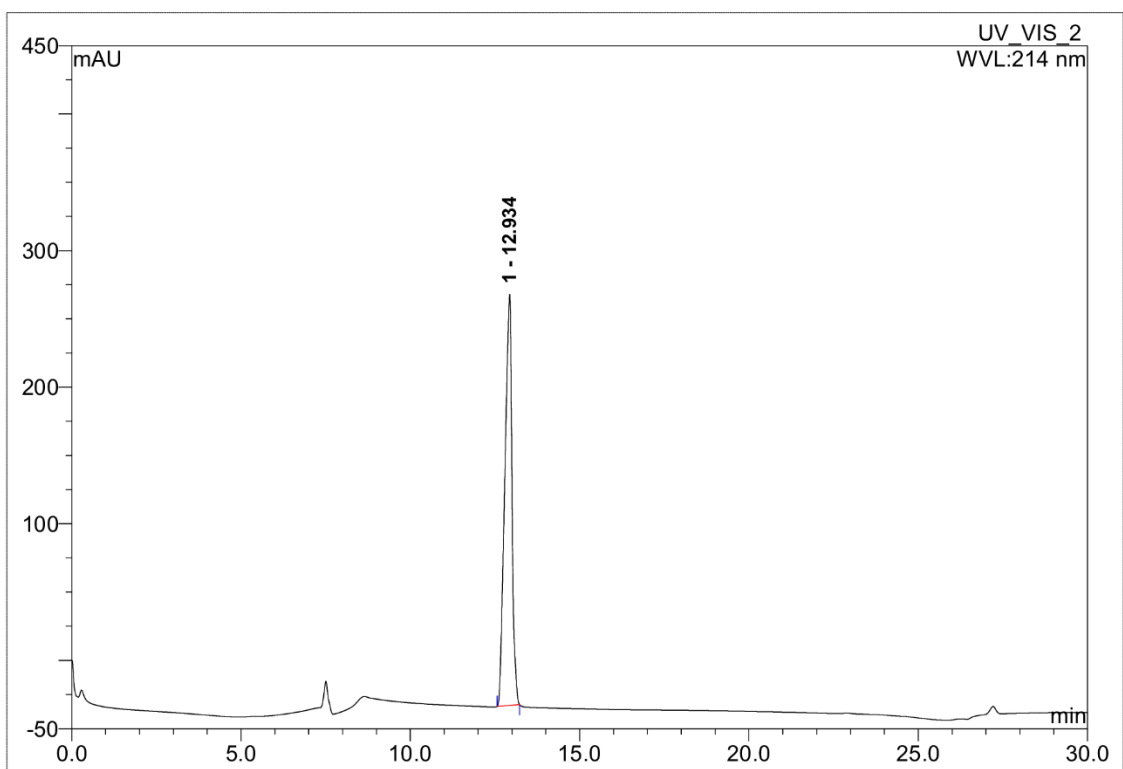

**Figure S2.** Analytical HPLC trace for **P10**.

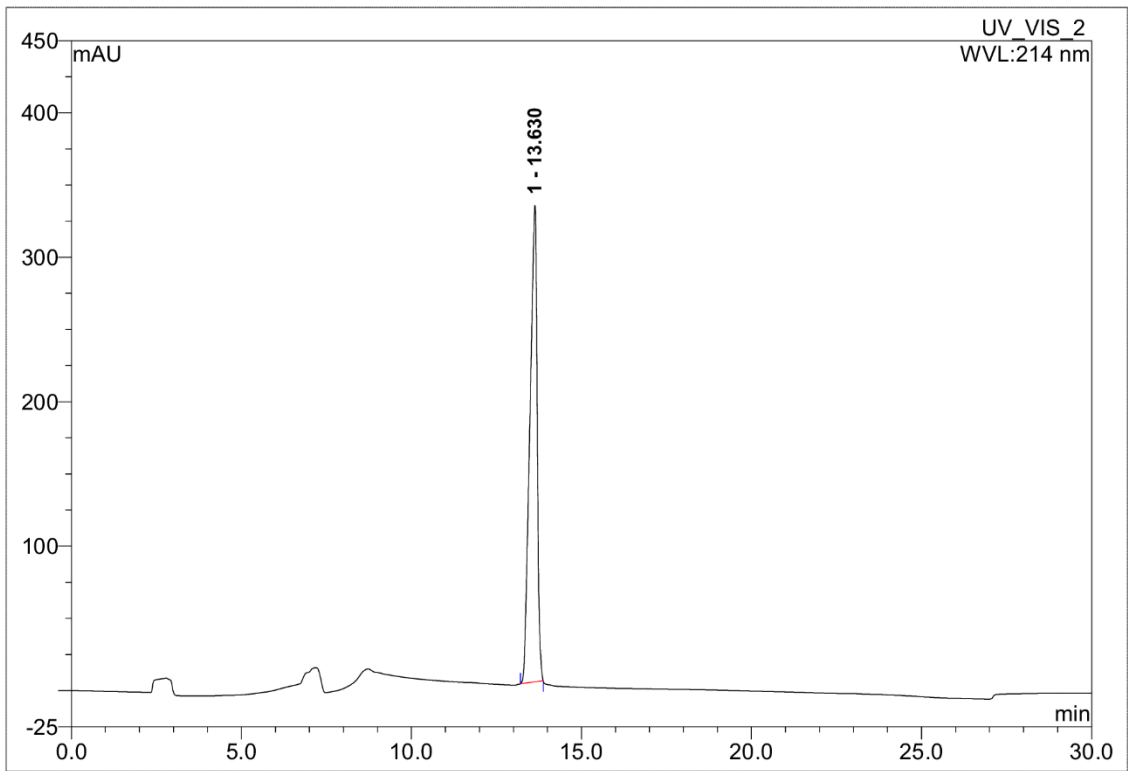

**Figure S3.** Analytical HPLC trace for **P12**.

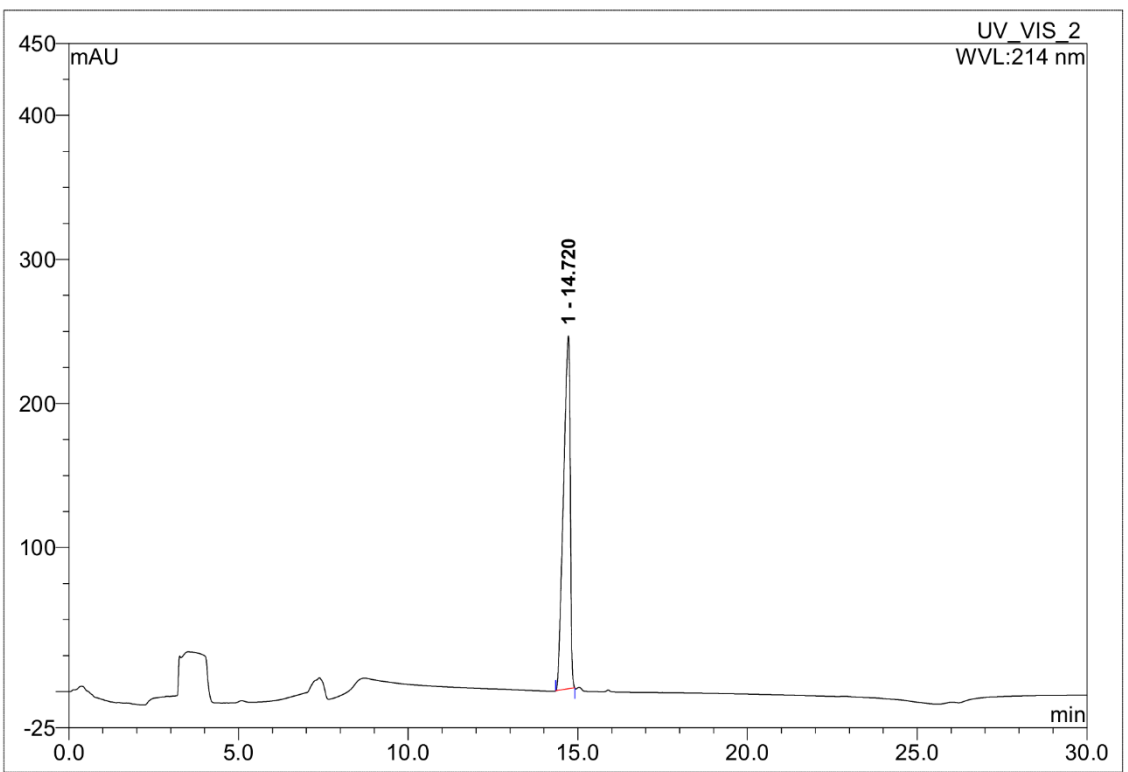

**Figure S4.** Analytical HPLC trace for **P14**.

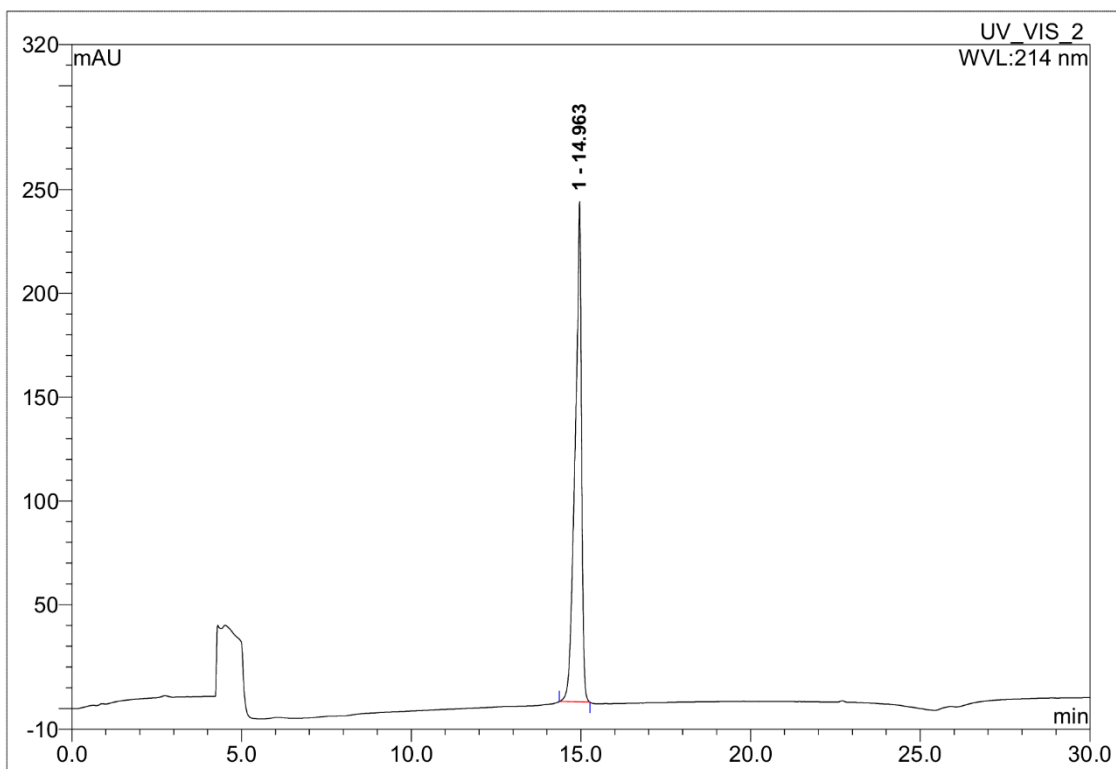

**Figure S5.** Analytical HPLC trace for **P16**.

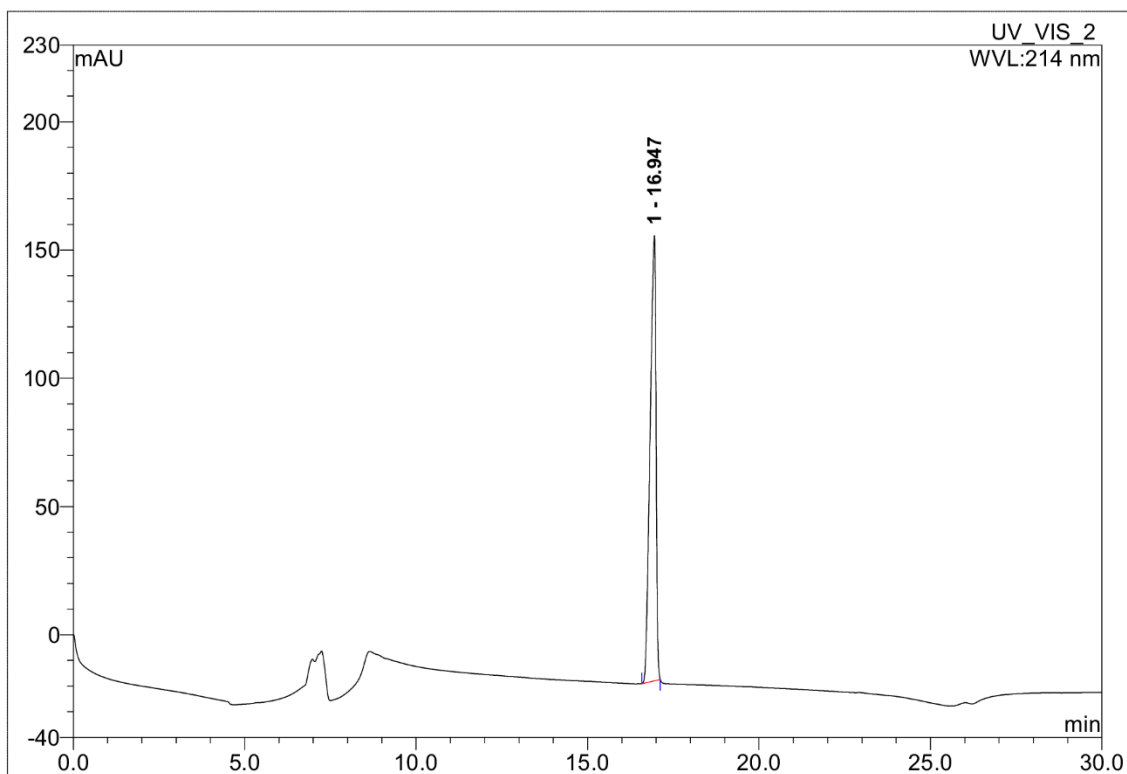

**Figure S6.** Analytical HPLC trace for **P18**.

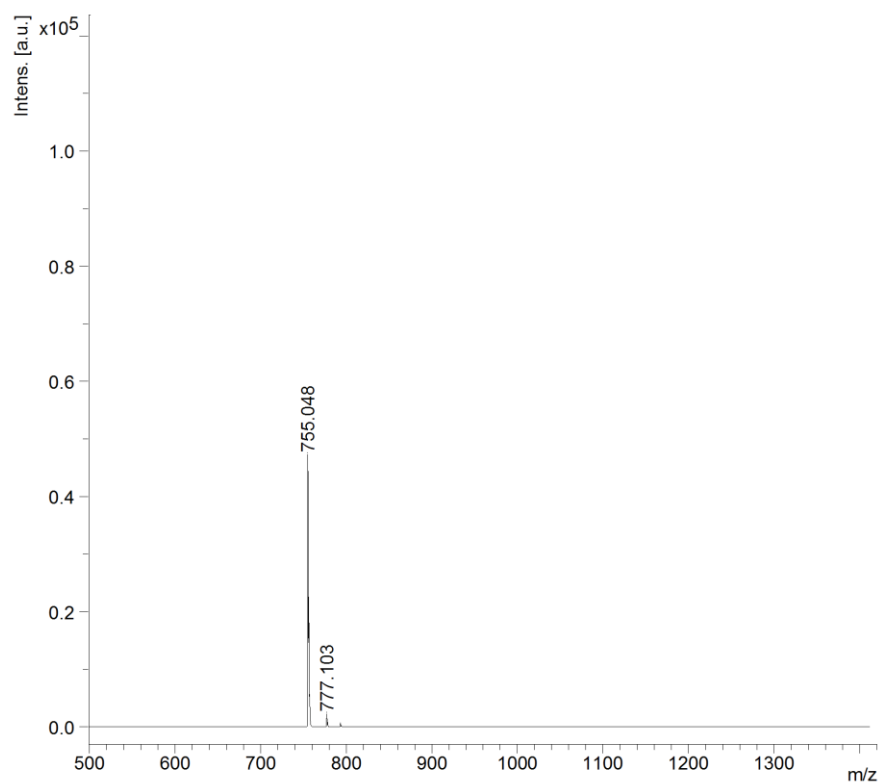

**Figure S7.** MALDI-TOF mass spectra of **P8**. Calc.  $(M+H)^+$  = 754.9793 Da; Obs.  $(M+H)^+$  = 755.048 Da.

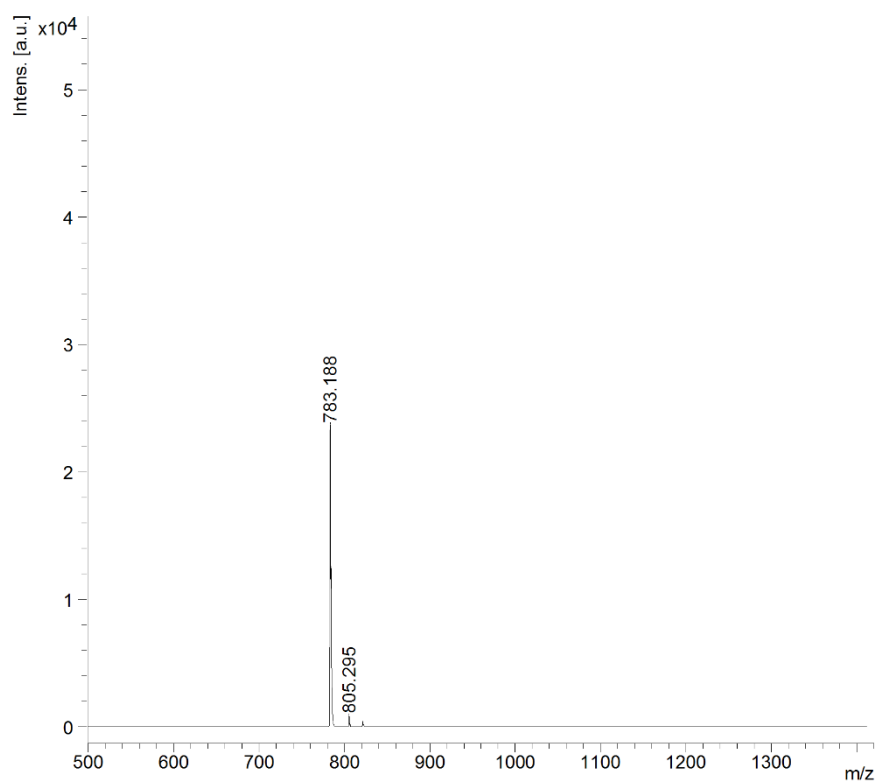

**Figure S8.** MALDI-TOF mass spectra of **P10**. Calc.  $(M+H)^+$  = 782.5650 Da; Obs.  $(M+H)^+$  = 783.188 Da,  $(M+Na)^+$  = 805.295 Da.

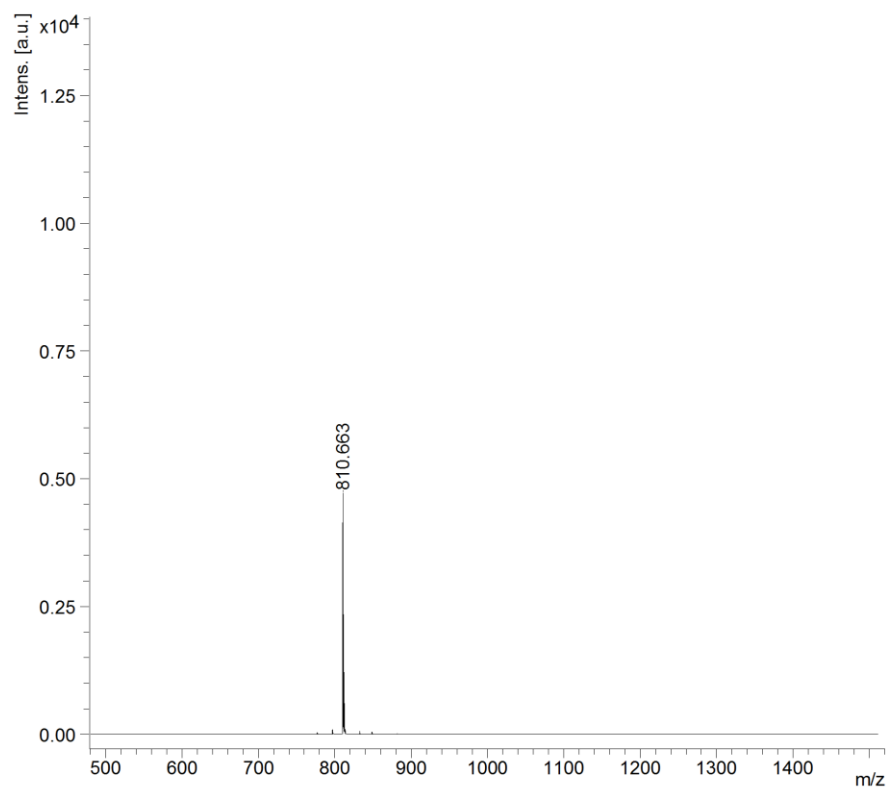

**Figure S9.** MALDI-TOF mass spectra of **P12**. Calc.  $(M+H)^+ = 810.5963$  Da; Obs.  $(M+H)^+ = 810.663$  Da.

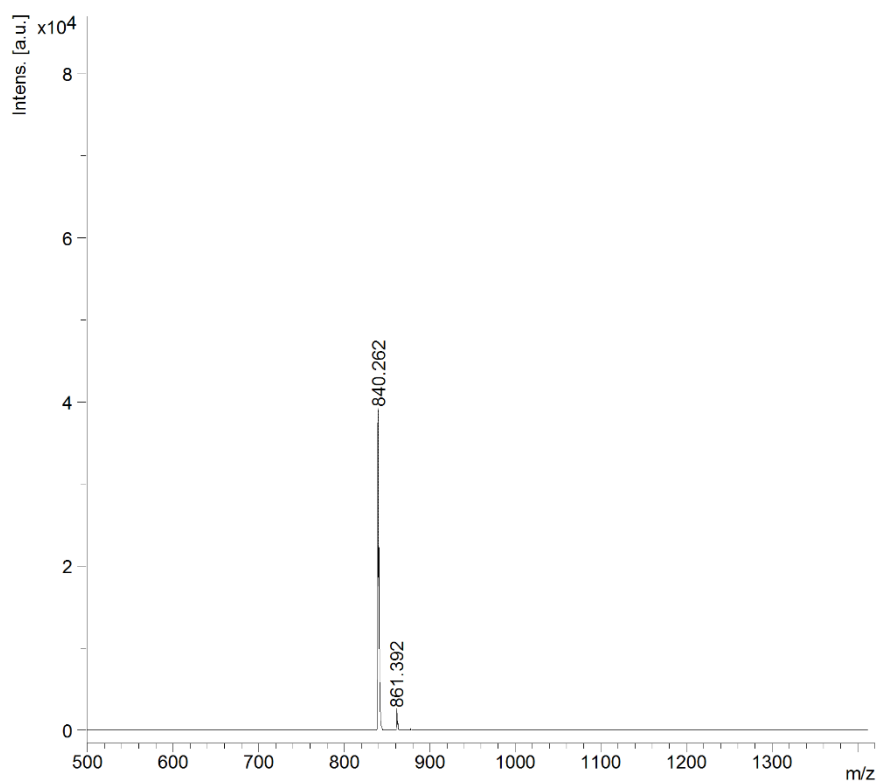

**Figure S10.** MALDI-TOF mass spectra of **P14**. Calc.  $(M+H)^+ = 838.6276$  Da; Obs.  $(M+2H)^+ = 840.262$  Da,  $(M+Na)^+ = 861.392$  Da.

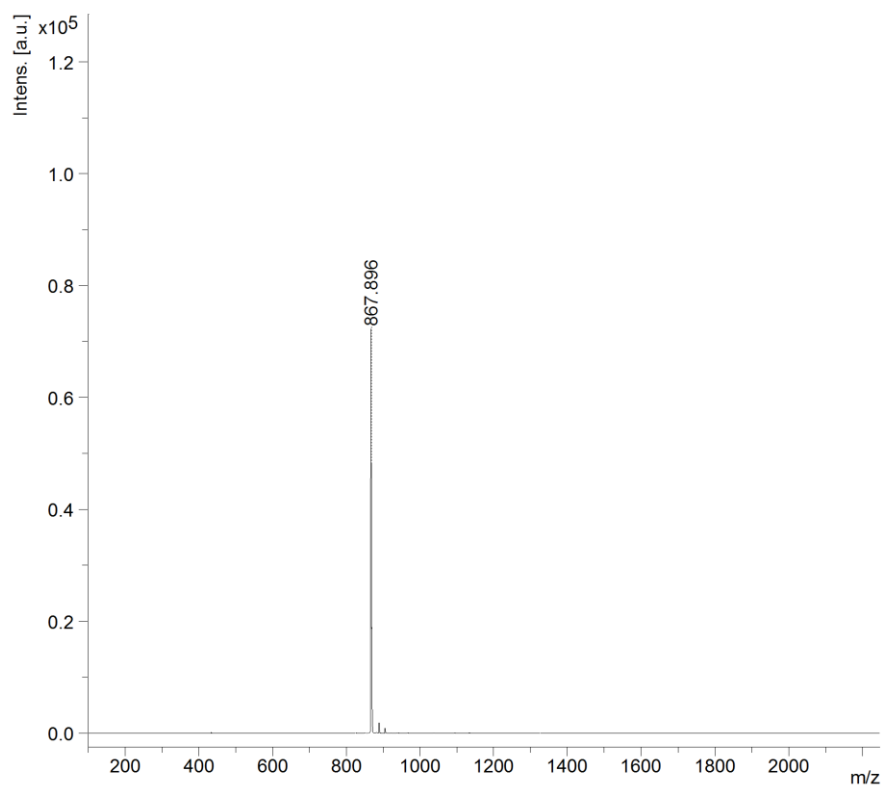

**Figure S11.** MALDI-TOF mass spectra of **P16**. Calc.  $(M+H)^+ = 867.6589$  Da; Obs.  $(M+H)^+ = 867.896$  Da.



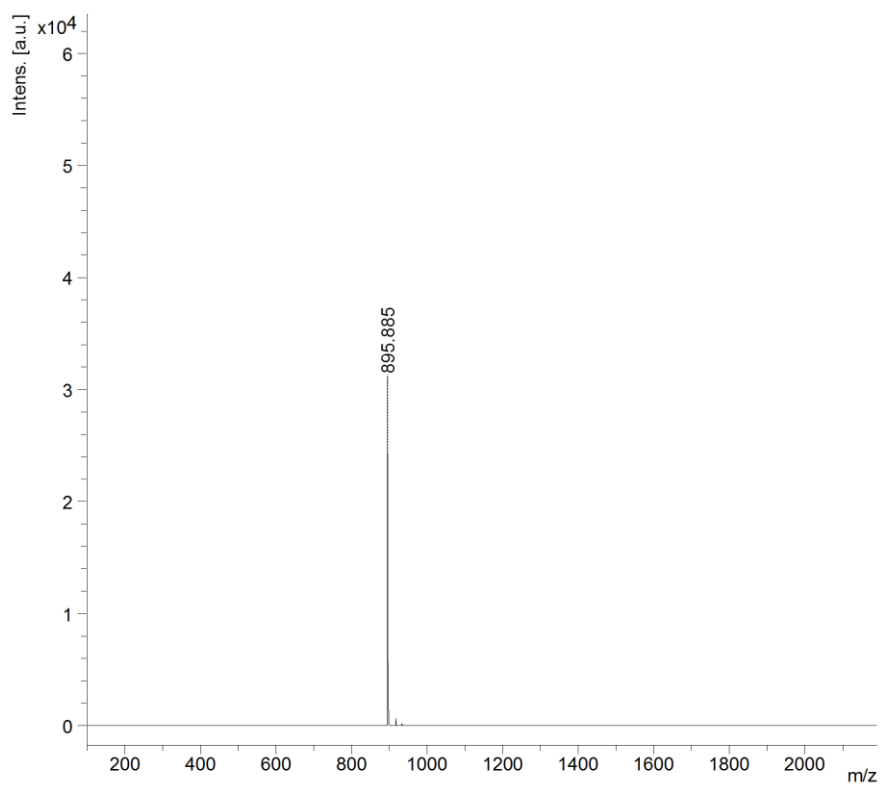

**Figure S12.** MALDI-TOF mass spectra of **P18**. Calc.  $(M+H)^+ = 894.6902$  Da; Obs.  $(M+2H)^+ = 895.885$  Da.

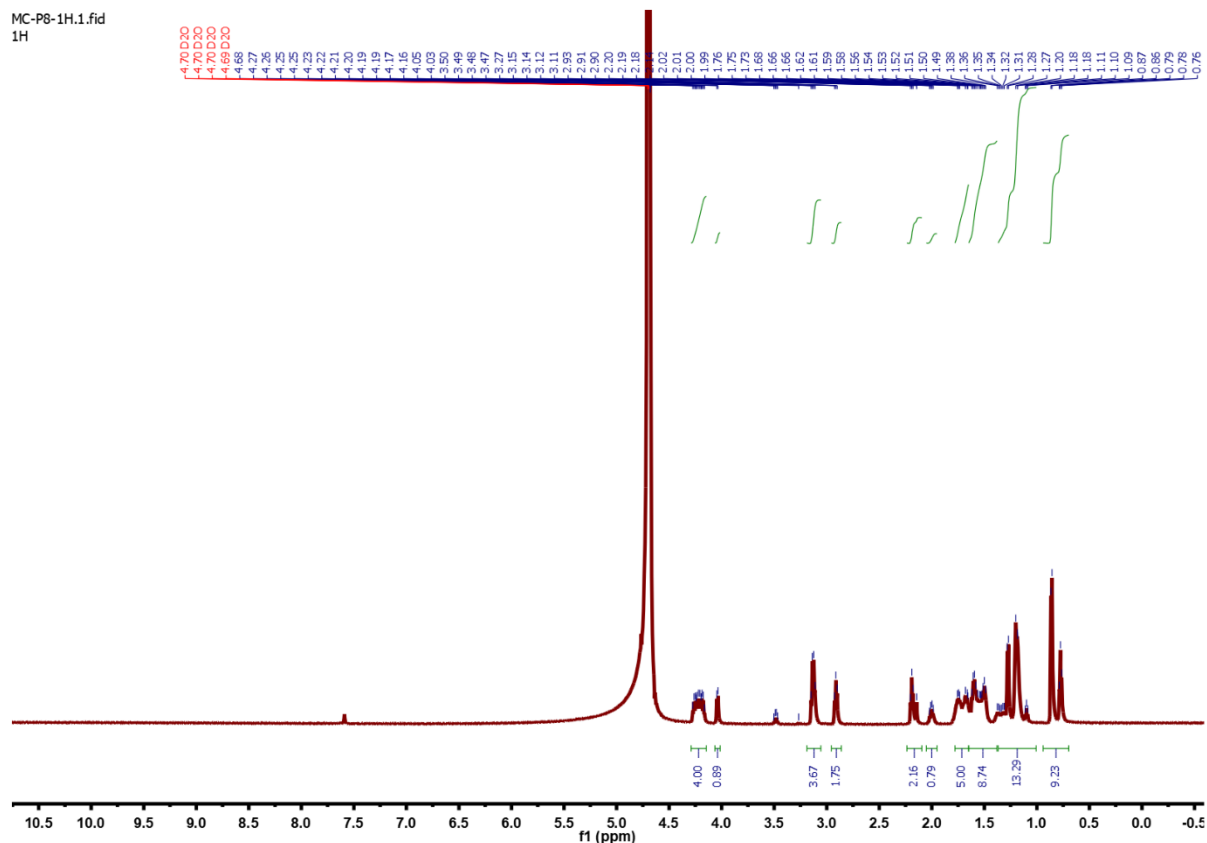

**Figure S13.**  $^1\text{H}$  NMR of **P8** in  $\text{D}_2\text{O}$  at room temperature.  $^1\text{H}$  NMR (600 MHz,  $\text{D}_2\text{O}$ ). 0.79-0.90 (9Hs: 3Hs from long-chain  $-\text{CH}_3$  and 6Hs from two  $-\text{CH}_3$  of Val), 1.2-1.4 (13 Hs: 10Hs from long-chain, 3Hs from  $-\text{CH}_3$  of Ala), 1.6-1.8 (14 Hs: 8Hs from Arg, 4Hs from Lys, 2H from long-chain), 2.05-2.2 (3Hs: 1Hs from Val, 2Hs from K), 2.9-3.1 (6Hs: 4Hs from Arg, 2Hs from Lys), 4.06-4.2 (5Hs, 5  $\alpha\text{H}$ ).

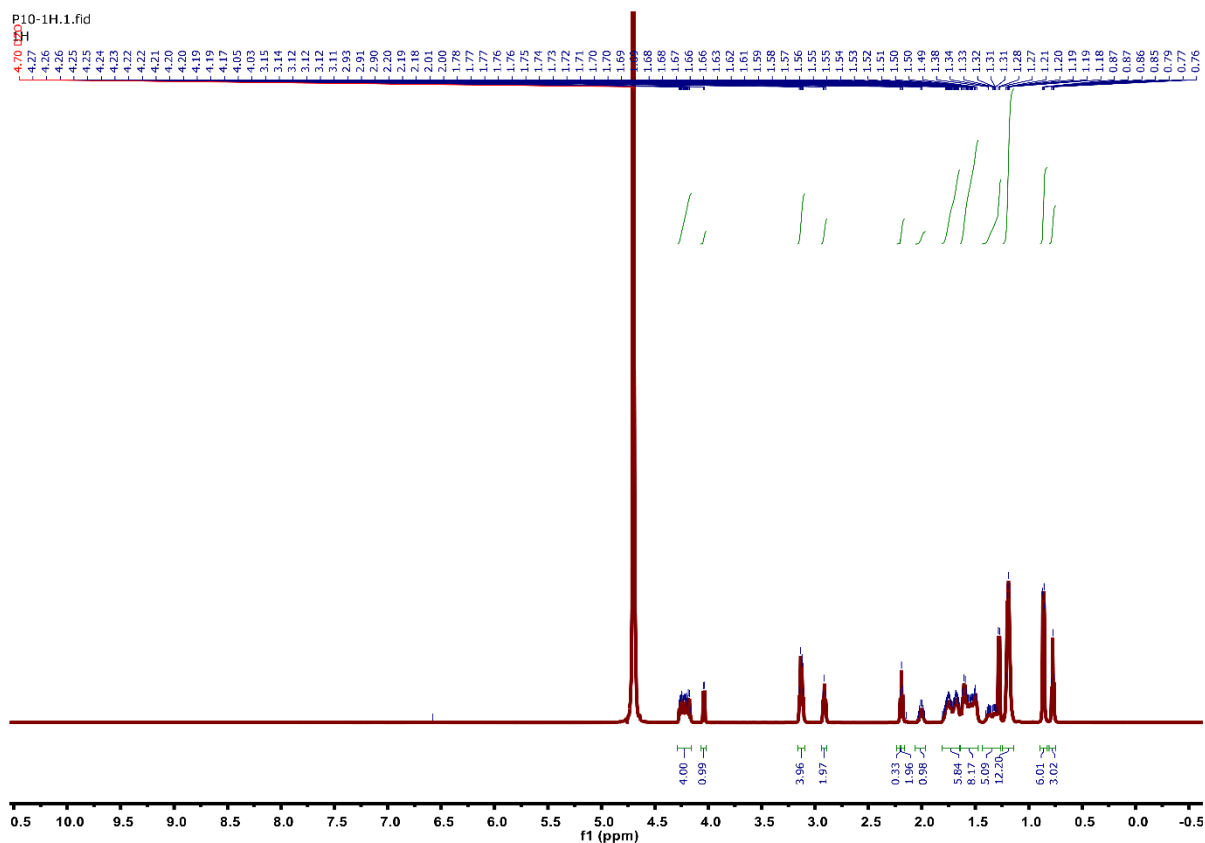

**Figure S14.**  $^1\text{H}$  NMR of **P10** in  $\text{D}_2\text{O}$  at room temperature.  $^1\text{H}$  NMR (600 MHz,  $\text{D}_2\text{O}$ ). 0.8-0.89 (9Hs: 3Hs from long-chain  $-\text{CH}_3$  and 6Hs from two  $-\text{CH}_3$  of Val), 1.2-1.4 (17 Hs: 14Hs from long-chain, 3Hs from  $-\text{CH}_3$  of Ala), 1.6-1.8 (14 Hs: 8Hs from Arg, 4Hs from Lys, 2H from long-chain), 2.06-2.2 (3Hs: 1Hs from Val, 2Hs from K), 2.9-3.1 (6Hs: 4Hs from Arg, 2Hs from Lys), 4.07-4.2 (5Hs, 5  $\alpha\text{H}$ ).

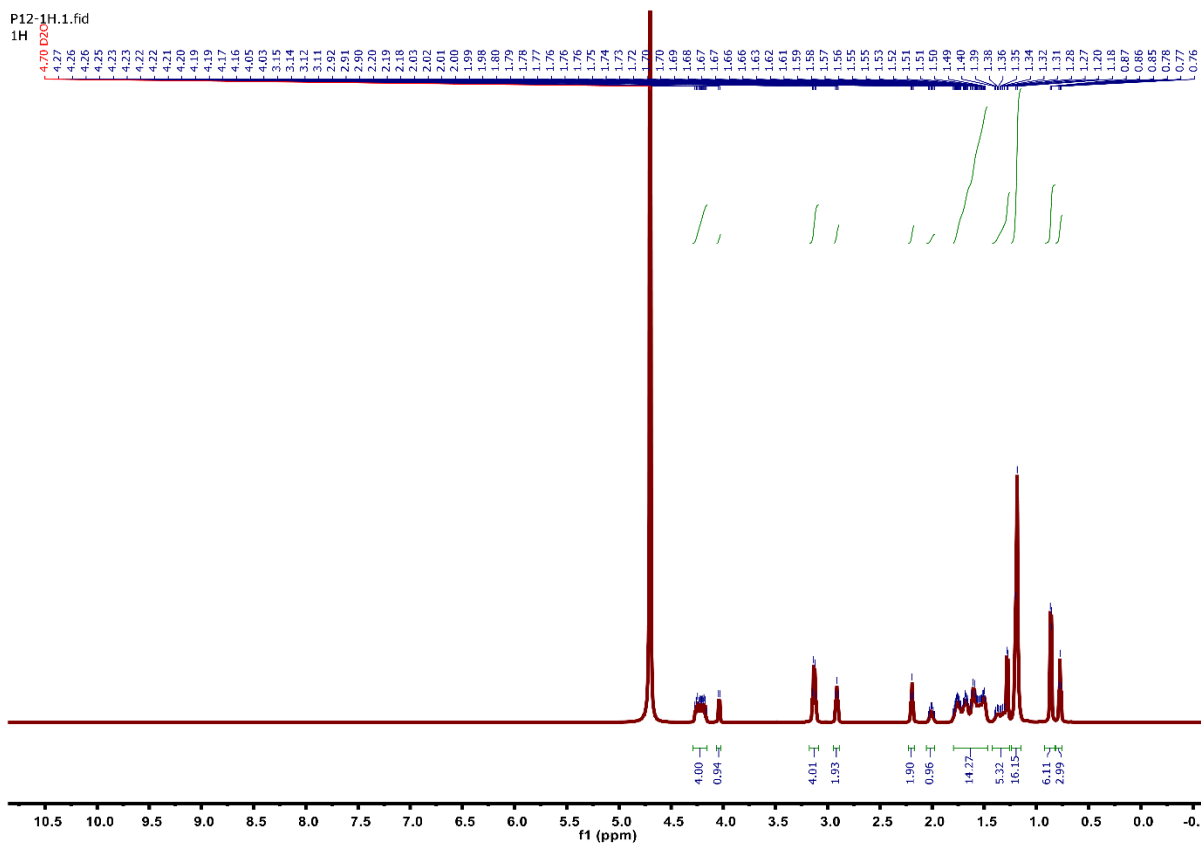

**Figure S15.**  $^1\text{H}$  NMR of **P12** in  $\text{D}_2\text{O}$  at room temperature.  $^1\text{H}$  NMR (600 MHz,  $\text{D}_2\text{O}$ ). 0.8-0.92 (9Hs: 3Hs from long-chain  $-\text{CH}_3$  and 6Hs from two  $-\text{CH}_3$  of Val), 1.2-1.4 (21 Hs: 18Hs from long-chain, 3Hs from  $-\text{CH}_3$  of Ala), 1.7 (14 Hs: 8Hs from Arg, 4Hs from Lys, 2H from long-chain), 2.05-2.2 (3Hs: 1Hs from Val, 2Hs from K), 2.9-3.1 (6Hs: 4Hs from Arg, 2Hs from Lys), 4.06-4.2 (5Hs, 5  $\alpha\text{H}$ ).

MC-P14-1H.4.fid  
1H

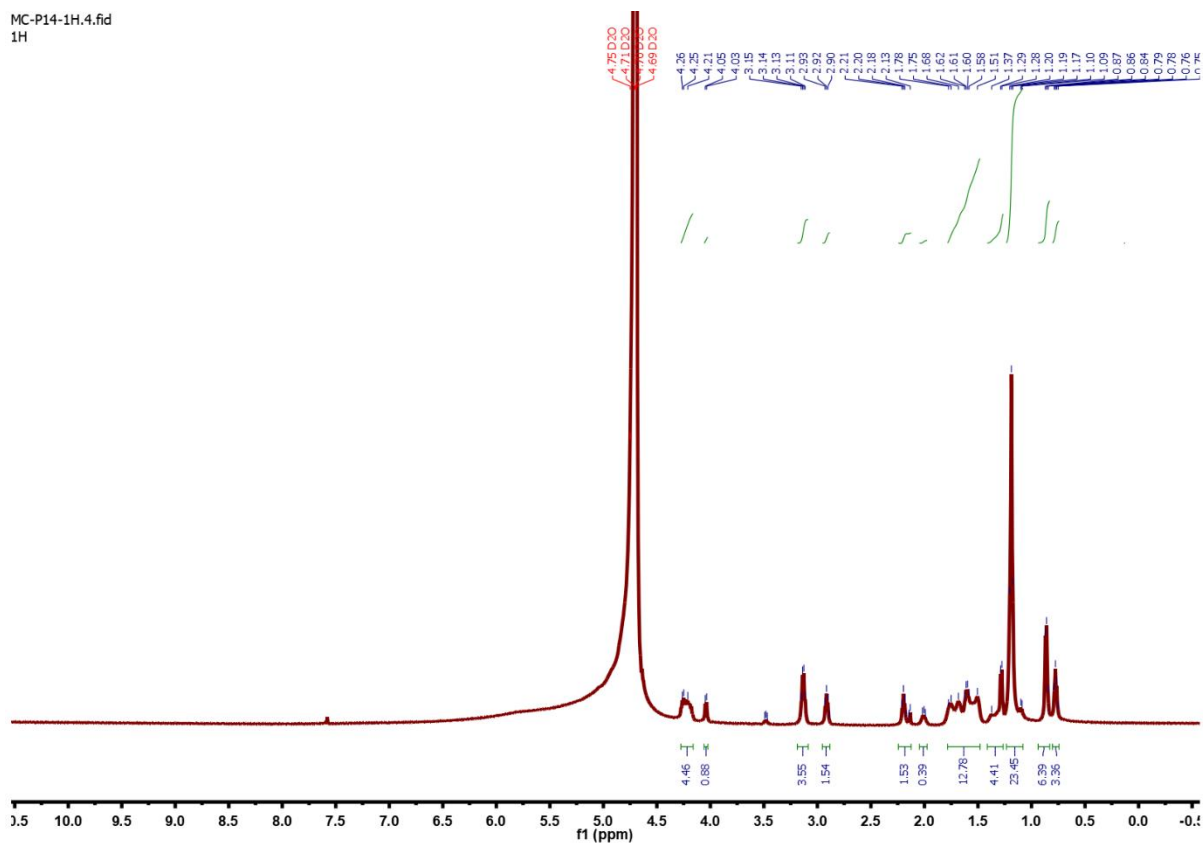

**Figure S16.** <sup>1</sup>H NMR of **P14** in D<sub>2</sub>O at room temperature. <sup>1</sup>H NMR (600 MHz, D<sub>2</sub>O). 0.83-0.93 (9Hs: 3Hs from long-chain -CH<sub>3</sub> and 6Hs from two -CH<sub>3</sub> of Val), 1.2-1.4 (27 Hs: 24Hs from long-chain, 3Hs from -CH<sub>3</sub> of Ala), 1.7 (13 Hs: 8Hs from Arg, 4Hs from Lys, 1H from Val), 2.05-2.2 (2Hs: 2Hs from K), 2.9-3.1 (6Hs: 4Hs from Arg, 2Hs from Lys), 4.1-4.3 (5Hs, 5 αH).

MC-P16-1H.1.fid  
1H

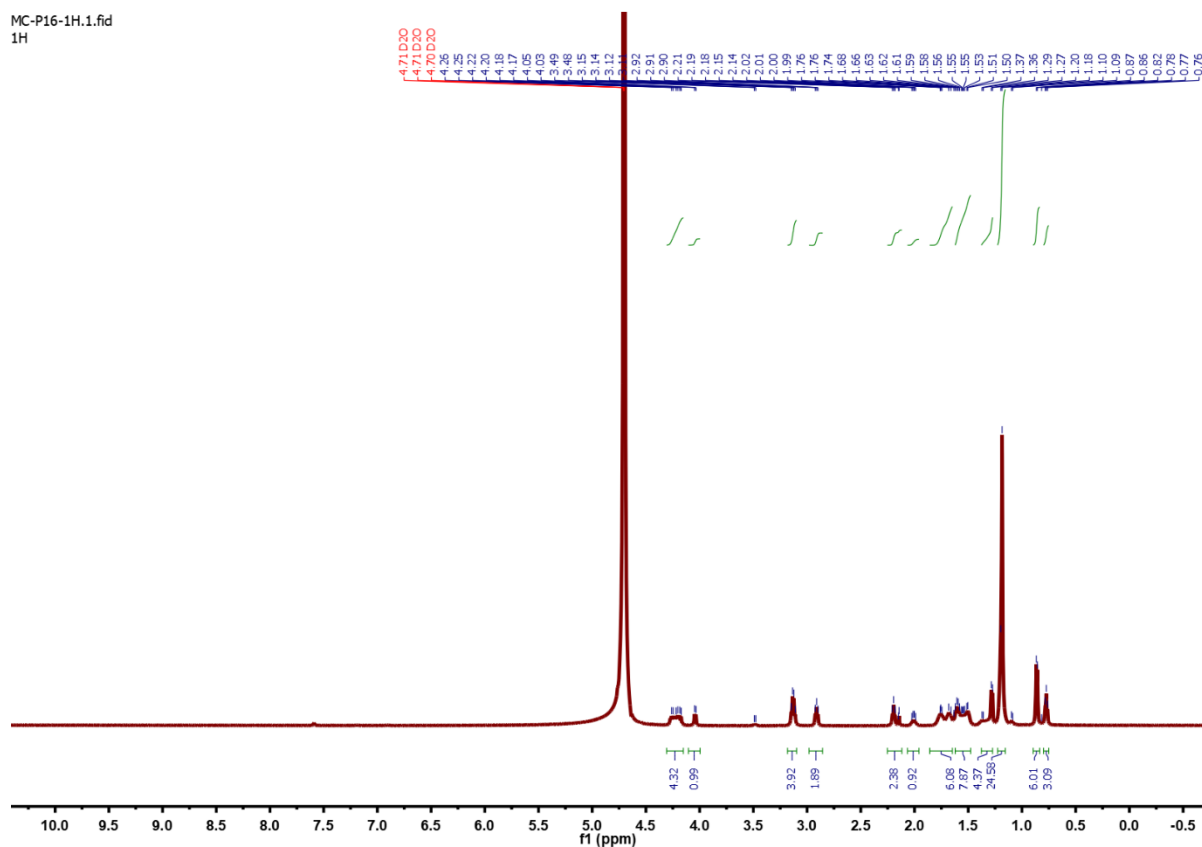

**Figure S17.** <sup>1</sup>H NMR of **P16** in D<sub>2</sub>O at room temperature. <sup>1</sup>H NMR (600 MHz, D<sub>2</sub>O). 0.79-0.89 (9Hs: 3Hs from long-chain -CH<sub>3</sub> and 6Hs from two -CH<sub>3</sub> of Val), 1.22-1.3 (29 Hs: 26Hs from long-chain, 3Hs from -CH<sub>3</sub> of Ala), 1.6-1.8 (14 Hs: 8Hs from Arg, 4Hs from Lys, 2H from long-chain), 2.06-2.25 (3Hs: 1Hs from Val, 2Hs from K), 2.9-3.18 (6Hs: 4Hs from Arg, 2Hs from Lys), 4.1-4.3 (5Hs, 5 αH).

MC-P18-1H.4.fid  
1H

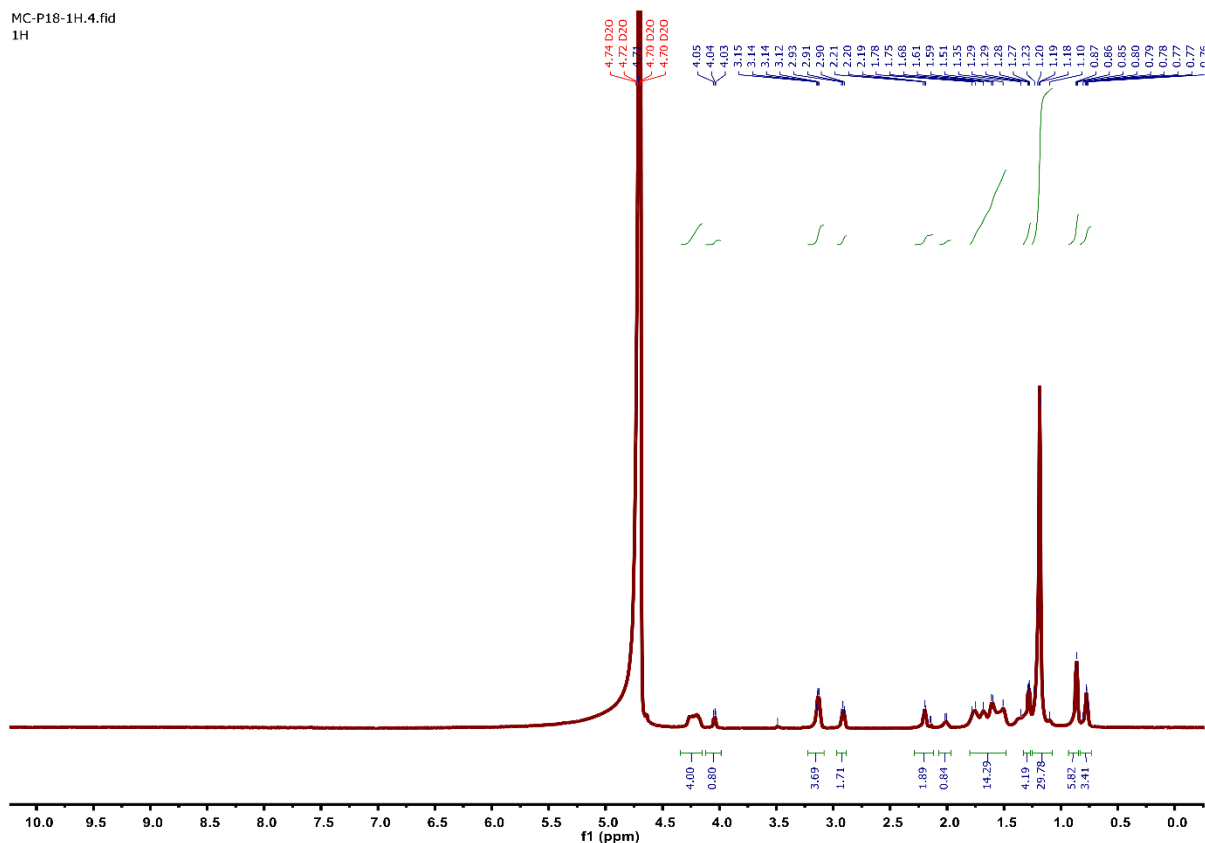

**Figure S18.**  $^1\text{H}$  NMR of **P18** in  $\text{D}_2\text{O}$  at room temperature.  $^1\text{H}$  NMR (600 MHz,  $\text{D}_2\text{O}$ ). 0.83-0.93 (9Hs: 3Hs from long-chain  $-\text{CH}_3$  and 6Hs from two  $-\text{CH}_3$  of Val), 1.25-1.3 (33 Hs: 30Hs from long-chain, 3Hs from  $-\text{CH}_3$  of Ala), 1.8 (14 Hs: 8Hs from Arg, 4Hs from Lys, 2H from long-chain), 2.07-2.2 (3Hs: 1Hs from Val, 2Hs from K), 2.9-3.2 (6Hs: 4Hs from Arg, 2Hs from Lys), 4.1-4.3 (5Hs, 5  $\alpha\text{H}$ ).

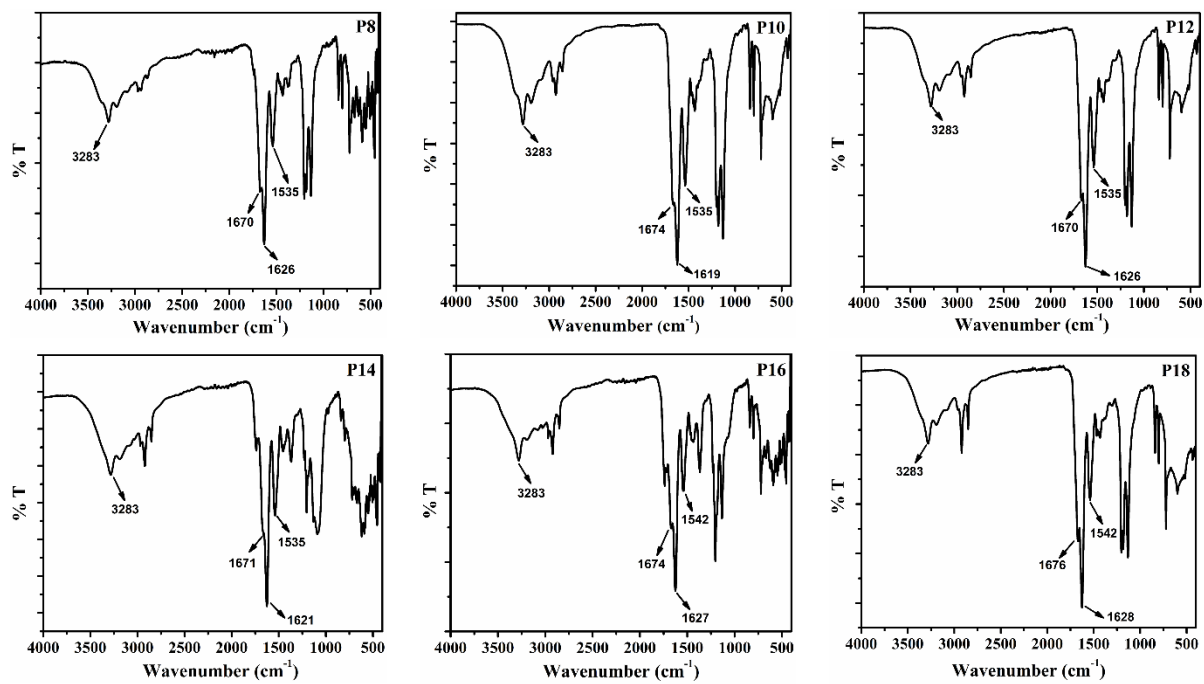

**Figure S19.** FTIR spectra of P8-P18.

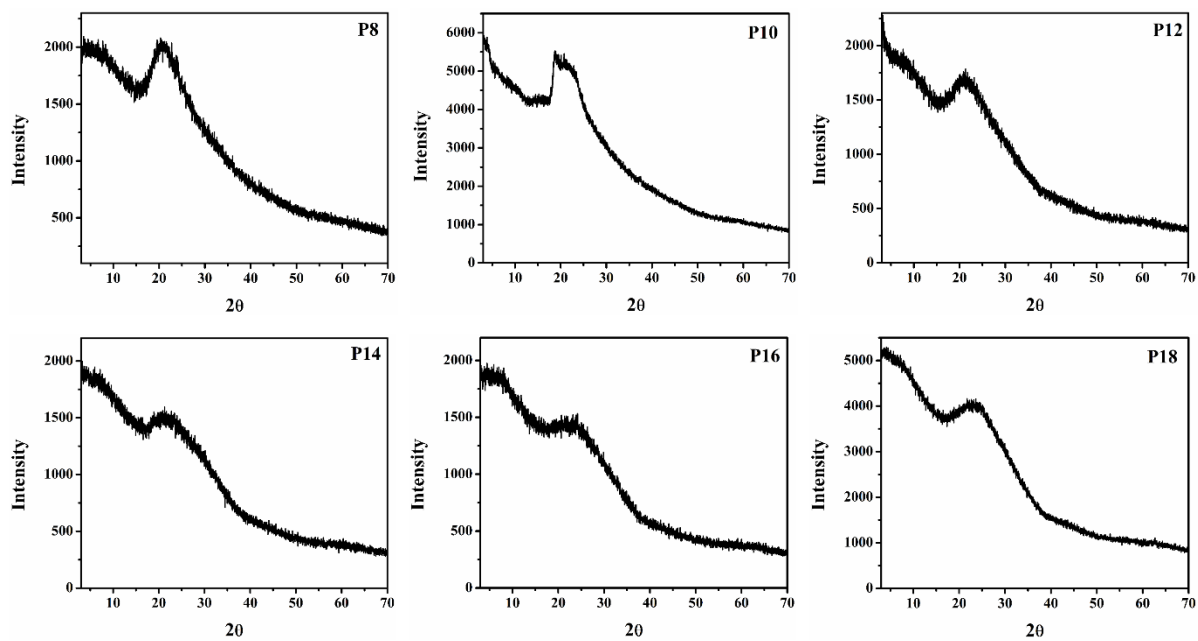

**Figure S20.** PXRD spectra of P8-P18.



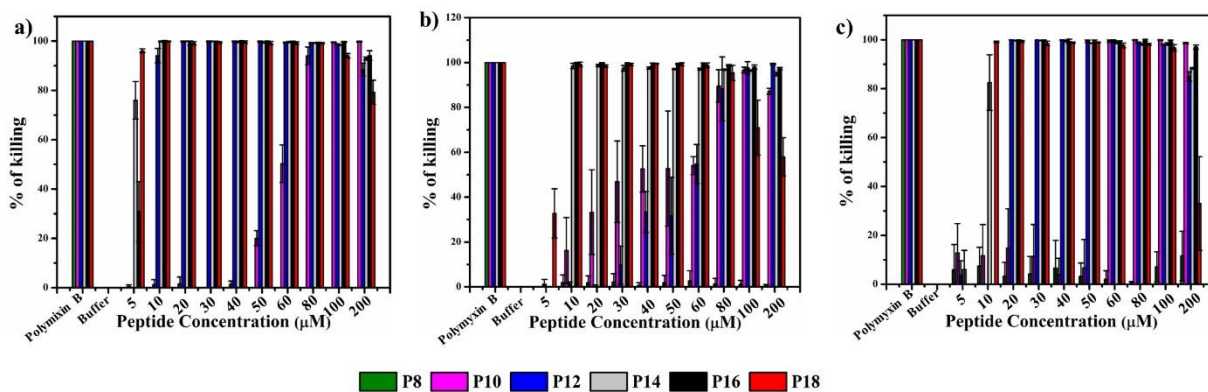

**Figure S21.** MIC<sub>90%</sub> of P8-P18 against a) *P. aeruginosa*, b) *K. pneumoniae*, c) *S. aureus* in the absence of salt by Micro broth dilution assay. 10 μM Polymyxin B and buffer were taken as positive and negative controls respectively.

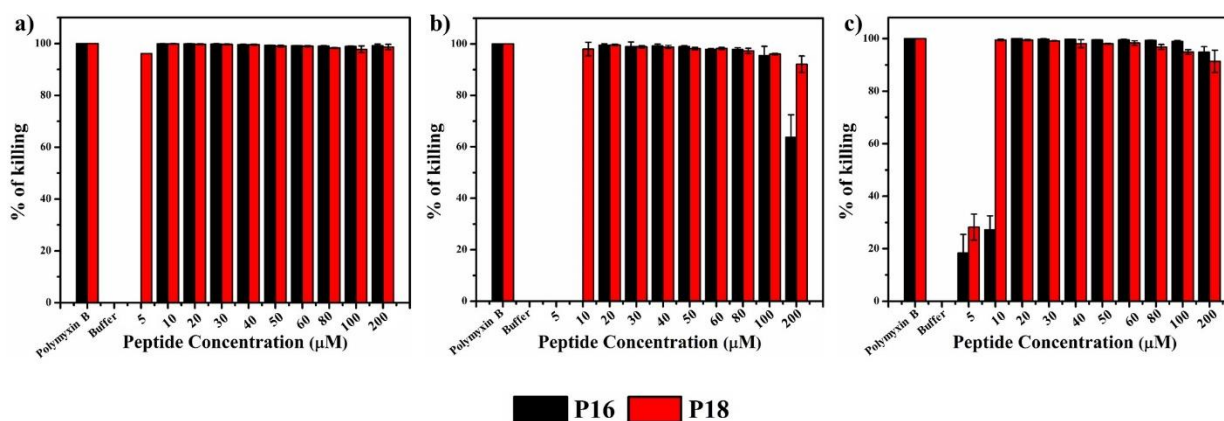

**Figure S22.** MIC<sub>99%</sub> of P16 and P18 against a) *P. aeruginosa*, b) *K. pneumoniae*, c) *S. aureus* in the presence of salt by Micro broth dilution assay. 10 μM polymyxin B and buffer were taken as positive and negative controls respectively.

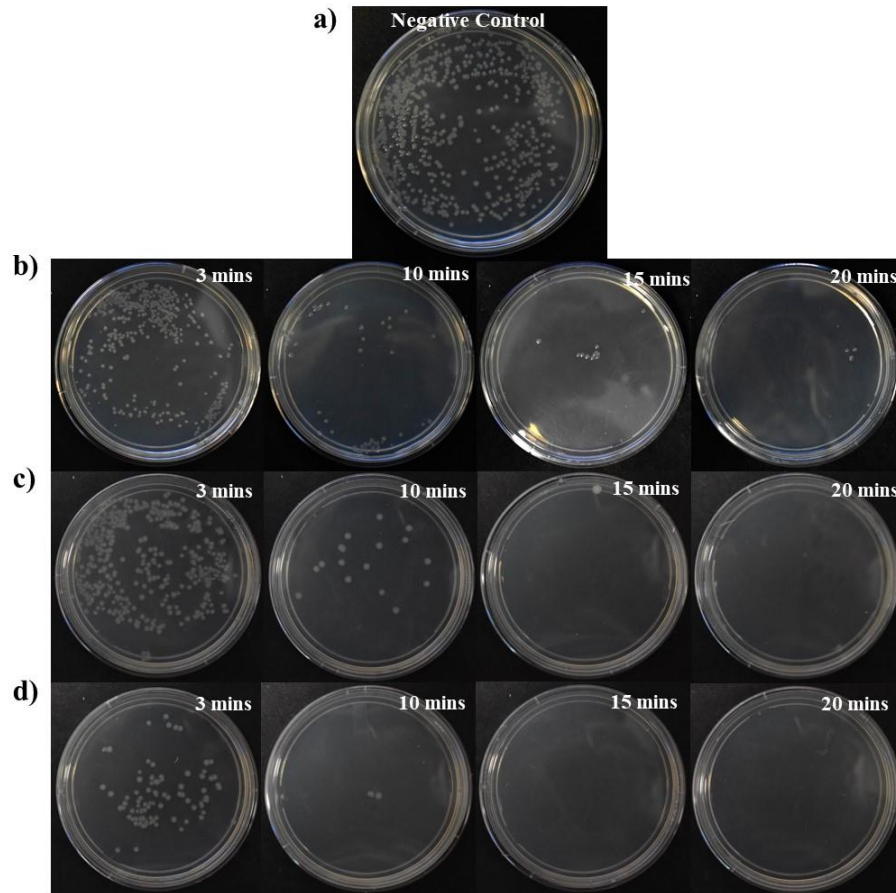

**Figure S23.** Time kinetics of the bactericidal activity of **P16** and **P18** at their respective MIC99% against *P. aeruginosa* cells. *P. aeruginosa* cells were treated with **P16** and **P18** for different time intervals and cells were spread on NA plate for CFU count after overnight incubation at 37 °C. Bacterial killing percentage was calculated from CFU count of the plate in comparison to the control plate. (a) Negative control (no peptides added) (b) Positive control plate (10 μM Polymyxin B treated cells), (c) plates treated with **P16** at time points 3, 10, 15 and 20 min, respectively and (d) plates treated with **P18** at time points 3, 10, 15 and 20 min, respectively.

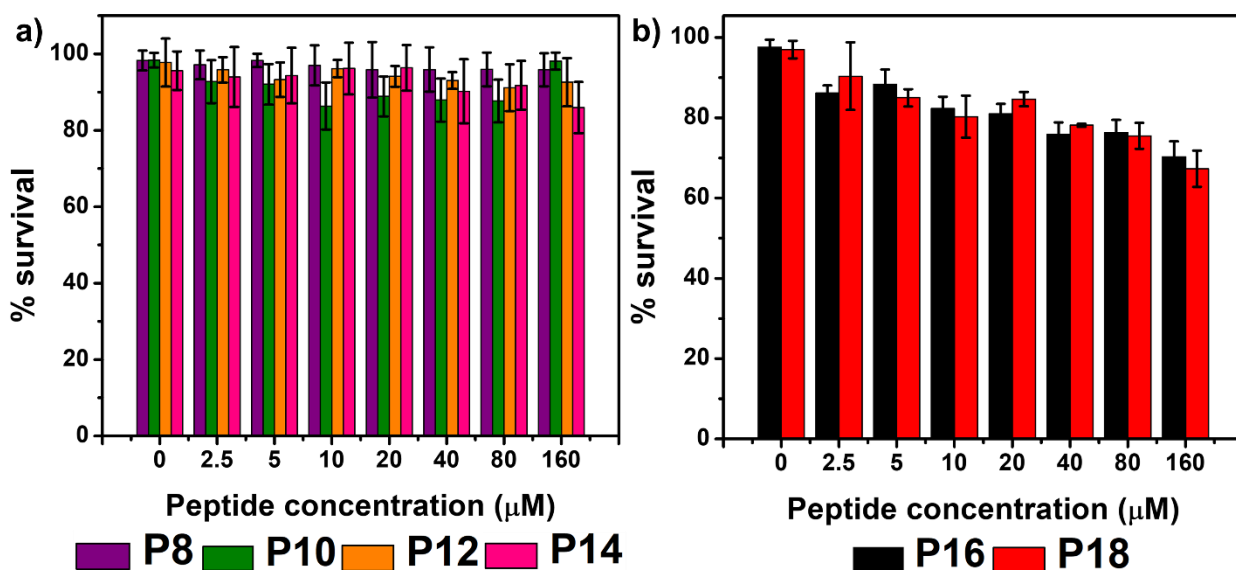

**Figure S24.** MTT assay of a) **P8**, **P10**, **P12** and **P14** on HEK293 cell line and b) **P16** and **P18** on HeLa cell line. Cells were treated with increasing concentrations of peptides and their viability was measured by monitoring the absorbance at 570 nm. All the experiments were performed in triplicates.

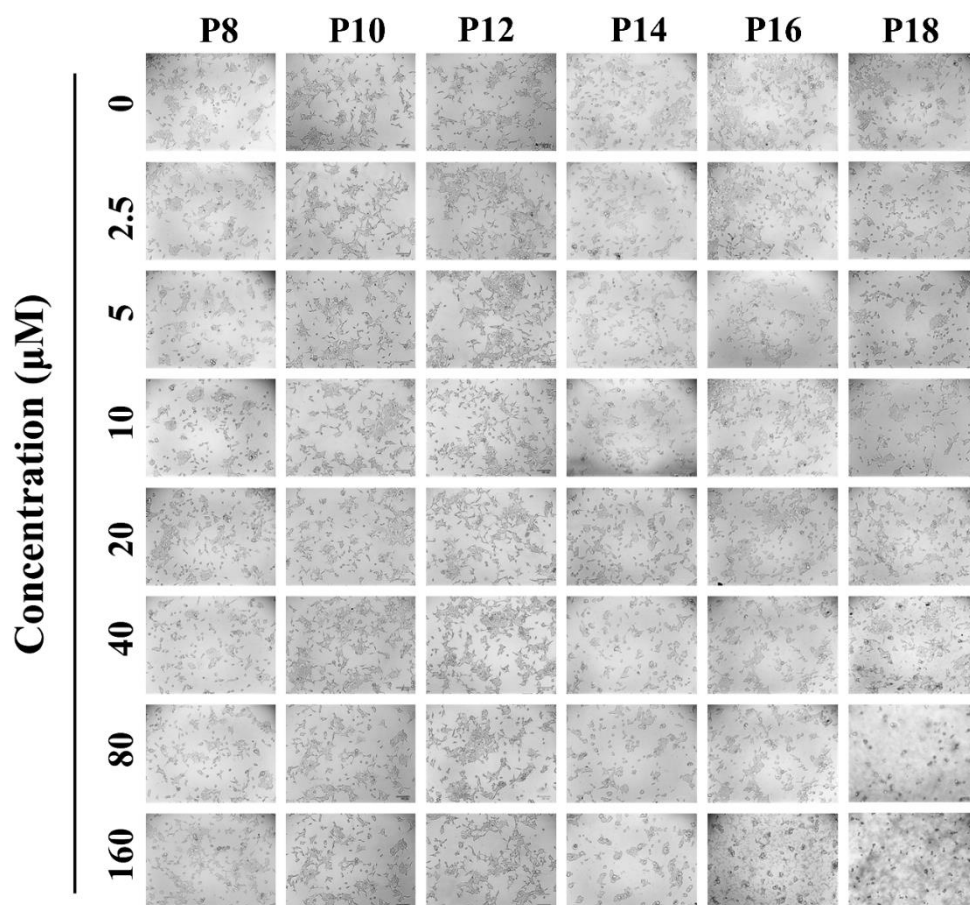

**Figure S25.** Microscopy images of HEK 293 cells treated with incremental concentrations (0-160 μM) of different lipopeptides **P8-P18** (Scale bar: 100 μm).

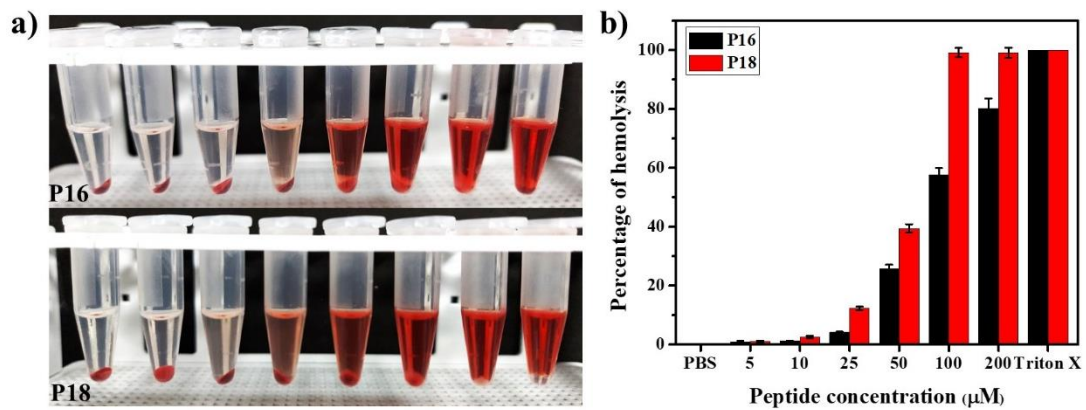

**Figure S26.** a) Digital images represent haemolytic assay for **P16** and **P18** against human RBC at different peptide concentrations (5, 10, 25, 50, 100, 200 μM), b) Bar diagram showing the % haemolysis for **P16** and **P18** against different concentrations of the peptides. Buffer and Triton-X 100 treated as negative and positive control.

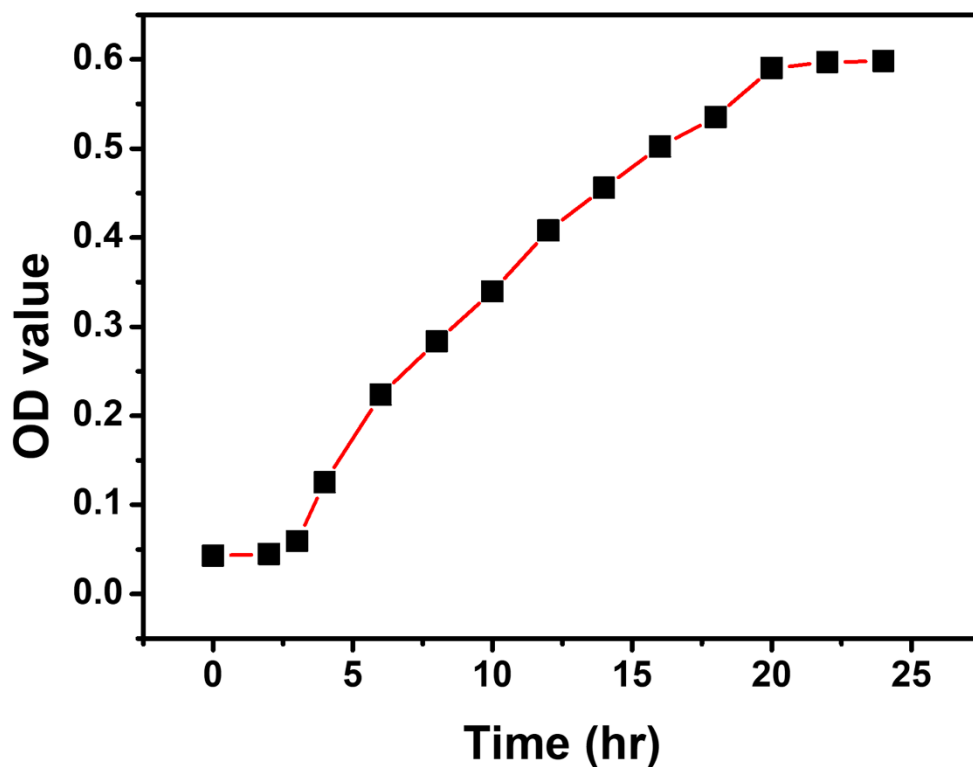

**Figure S27.** Growth curve of MRSA bacterial strain

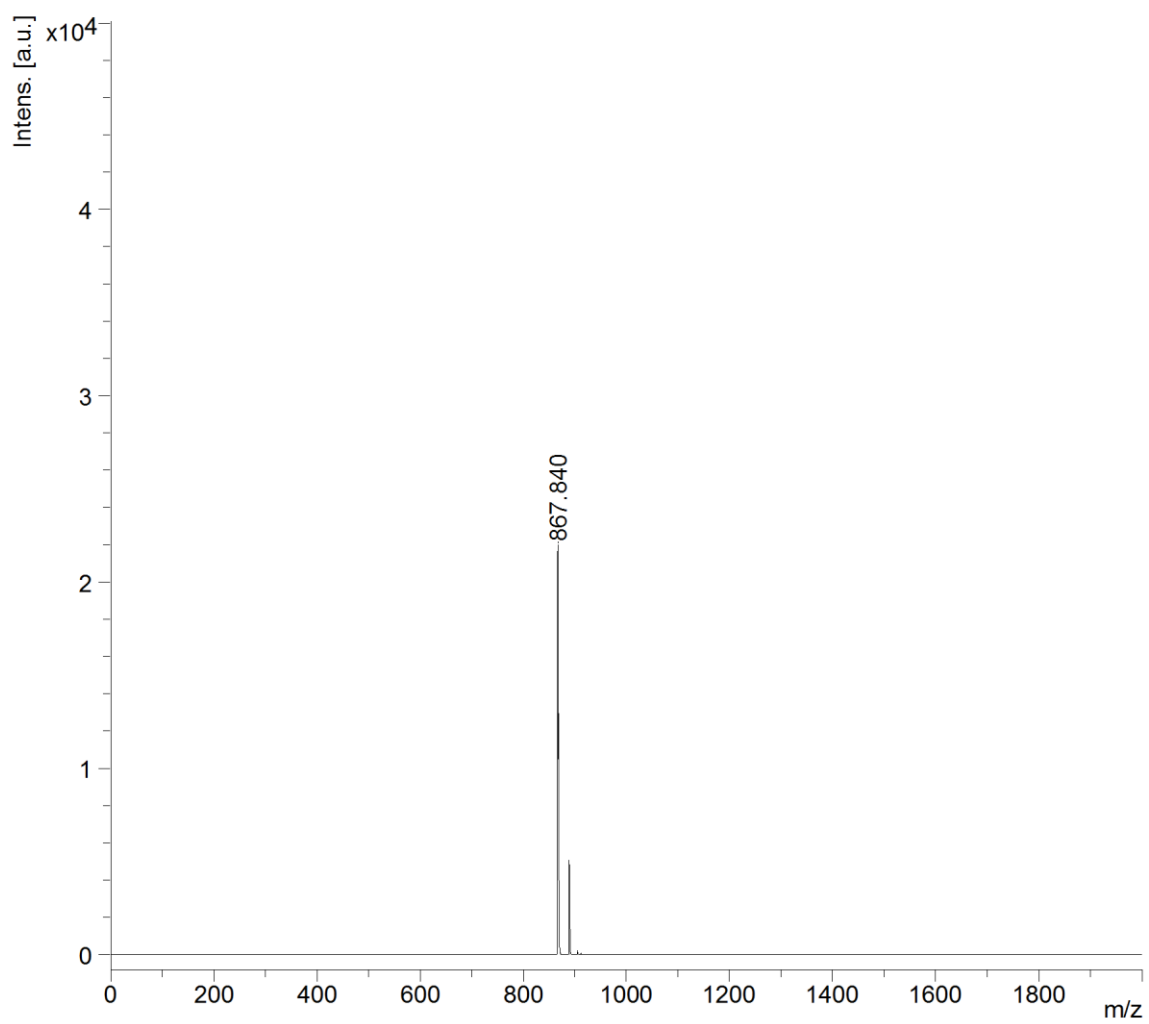

**Figure S28a.** Control MALDI-TOF mass spectra of **P16** for enzymatic action study. Calc.  $(M+H)^+ = 867.6589$  Da; Obs.  $(M+H)^+ = 867.840$  Da.

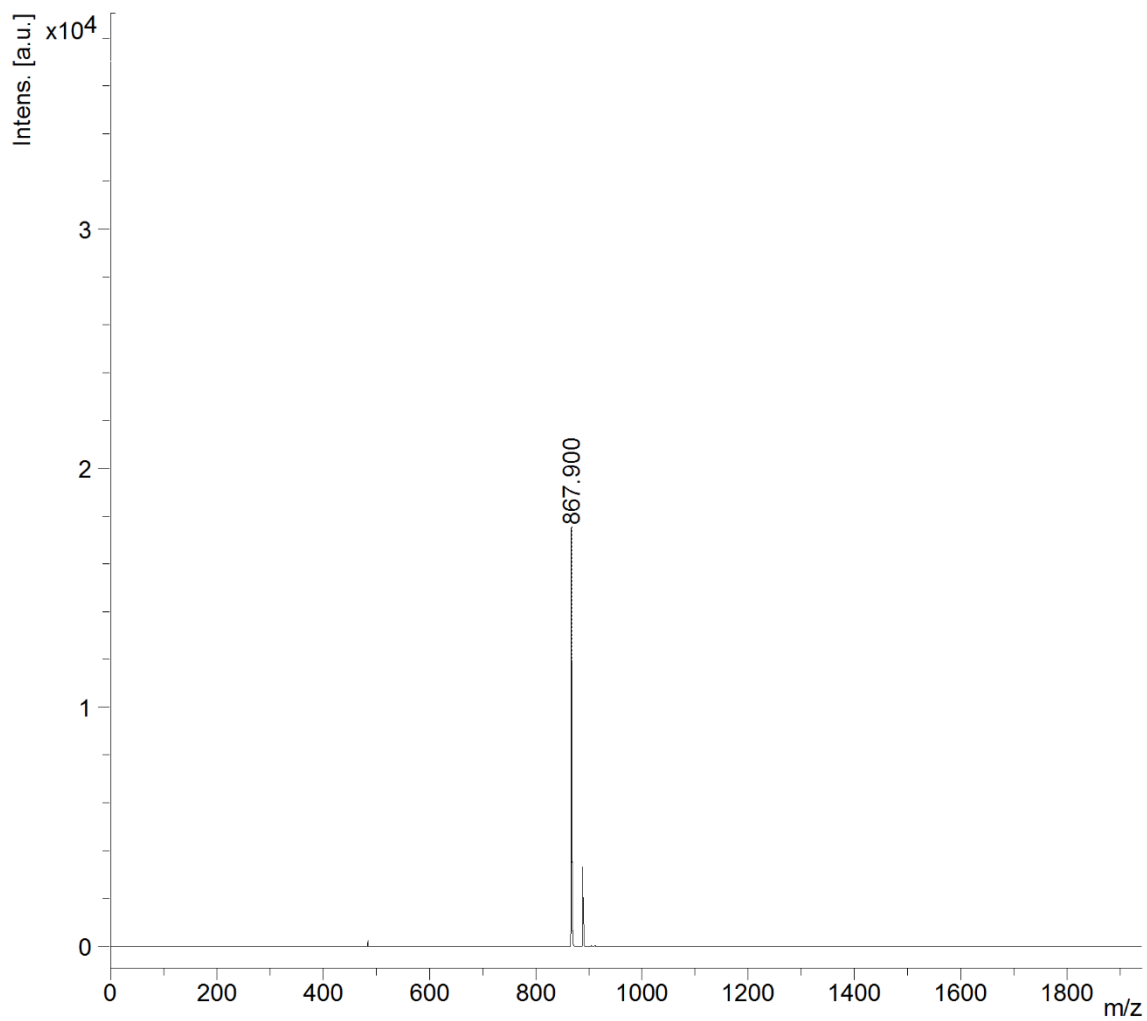

**Figure S28b.** MALDI-TOF mass spectra of **P16** in presence of proteinase K at 15 mins. Calc.  $(M+H)^+ = 867.6589$  Da; Obs.  $(M+H)^+ = 867.900$  Da.

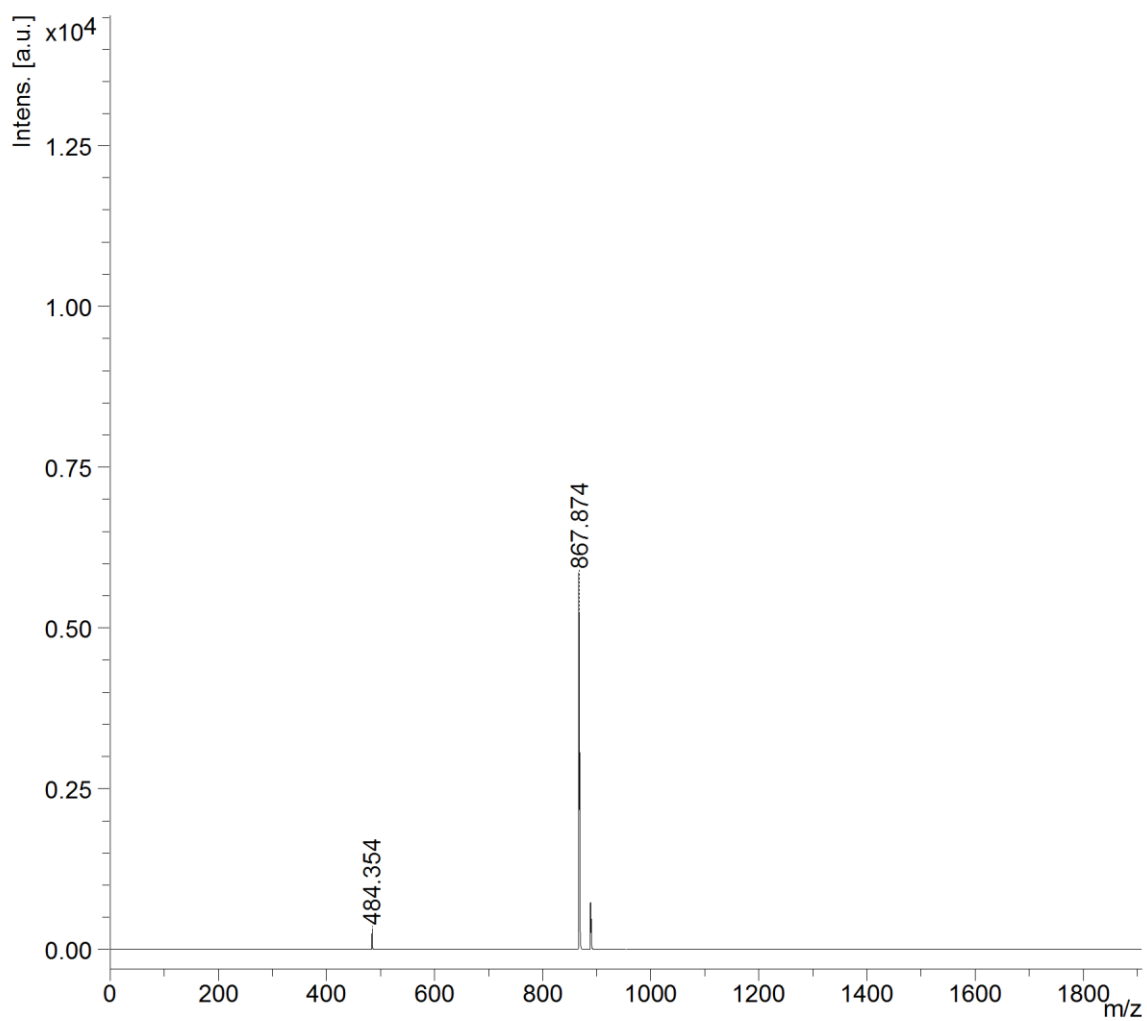

**Figure S28c.** MALDI-TOF mass spectra of **P16** in presence of proteinase K at 1 hr. Calc.  $(M+H)^+ = 867.6589$  Da; Obs.  $(M+H)^+ = 867.874$  Da.  $m/z$  484.357 corresponds to  $(M+2H^+)$  of the fragment C<sub>16</sub>-AR.

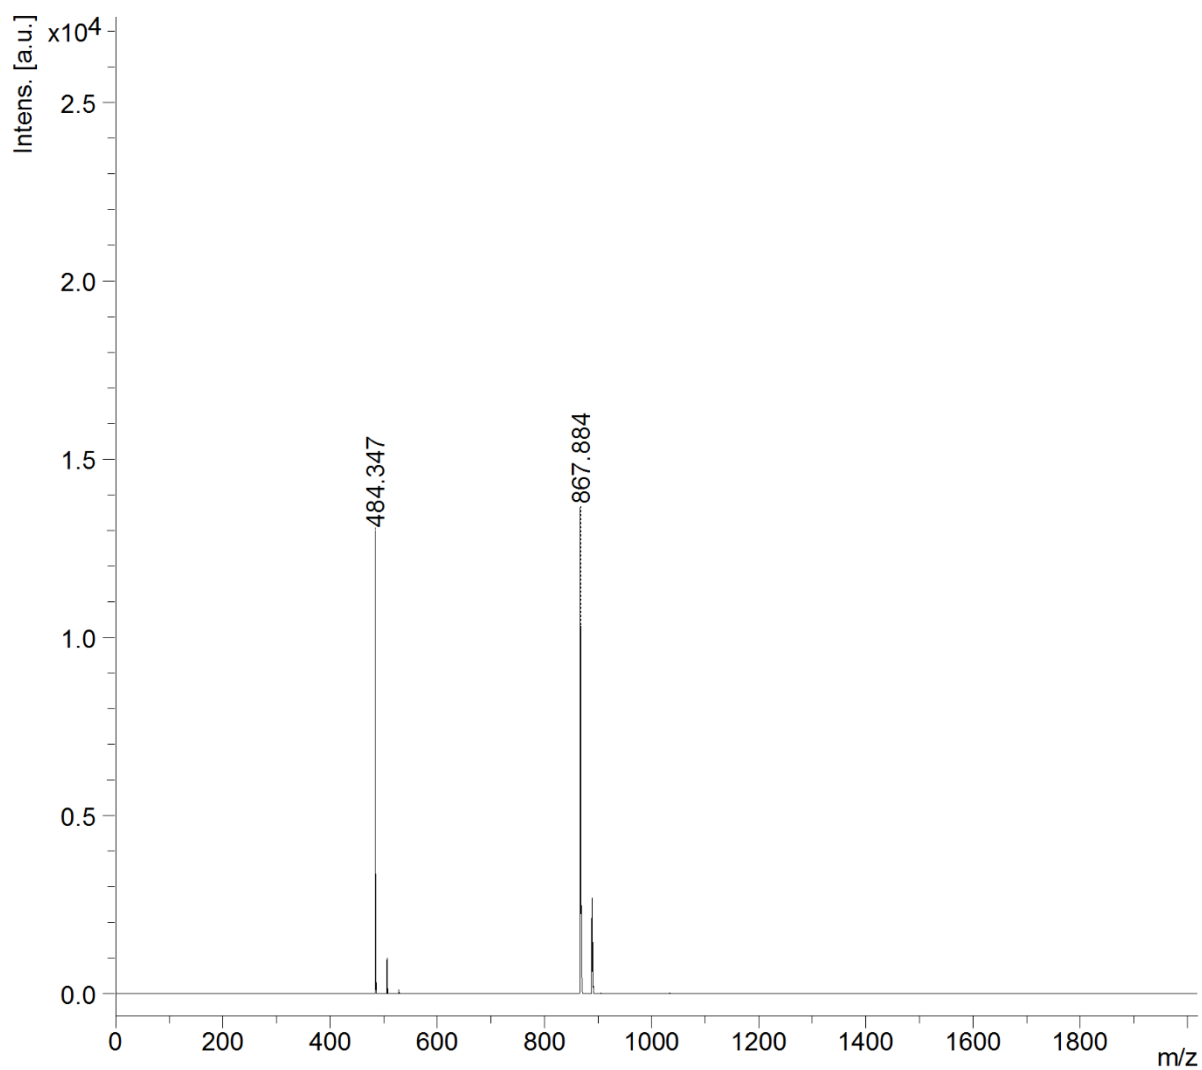

**Figure S28d.** MALDI-TOF mass spectra of **P16** in presence proteinase K at 3 hr. Calc.  $(M+H)^+$  = 867.6589 Da; Obs.  $(M+H)^+$  = 867.884 Da.  $m/z$  484.347 corresponds to  $(M+2H^+)$  of the fragment  $C_{16}$ -AR.



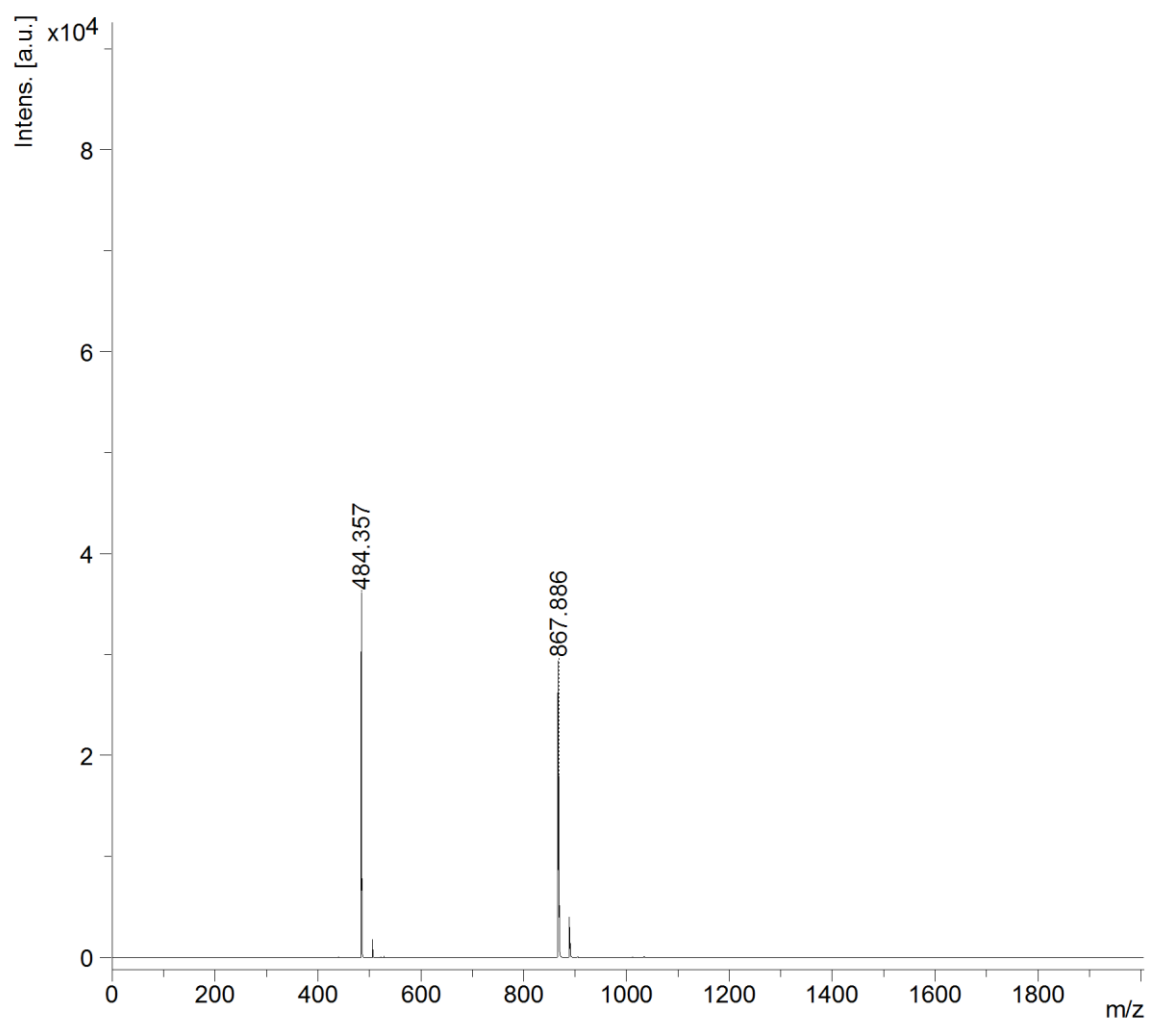

**Figure S28e.** MALDI-TOF mass spectra of **P16** in presence of proteinase K at 6 hr. Calc.  $(M+H)^+ = 867.6589$  Da; Obs.  $(M+H)^+ = 867.884$  Da.  $m/z = 484.357$  corresponds to  $(M+2H^+)$  of the fragment C<sub>16</sub>-AR.

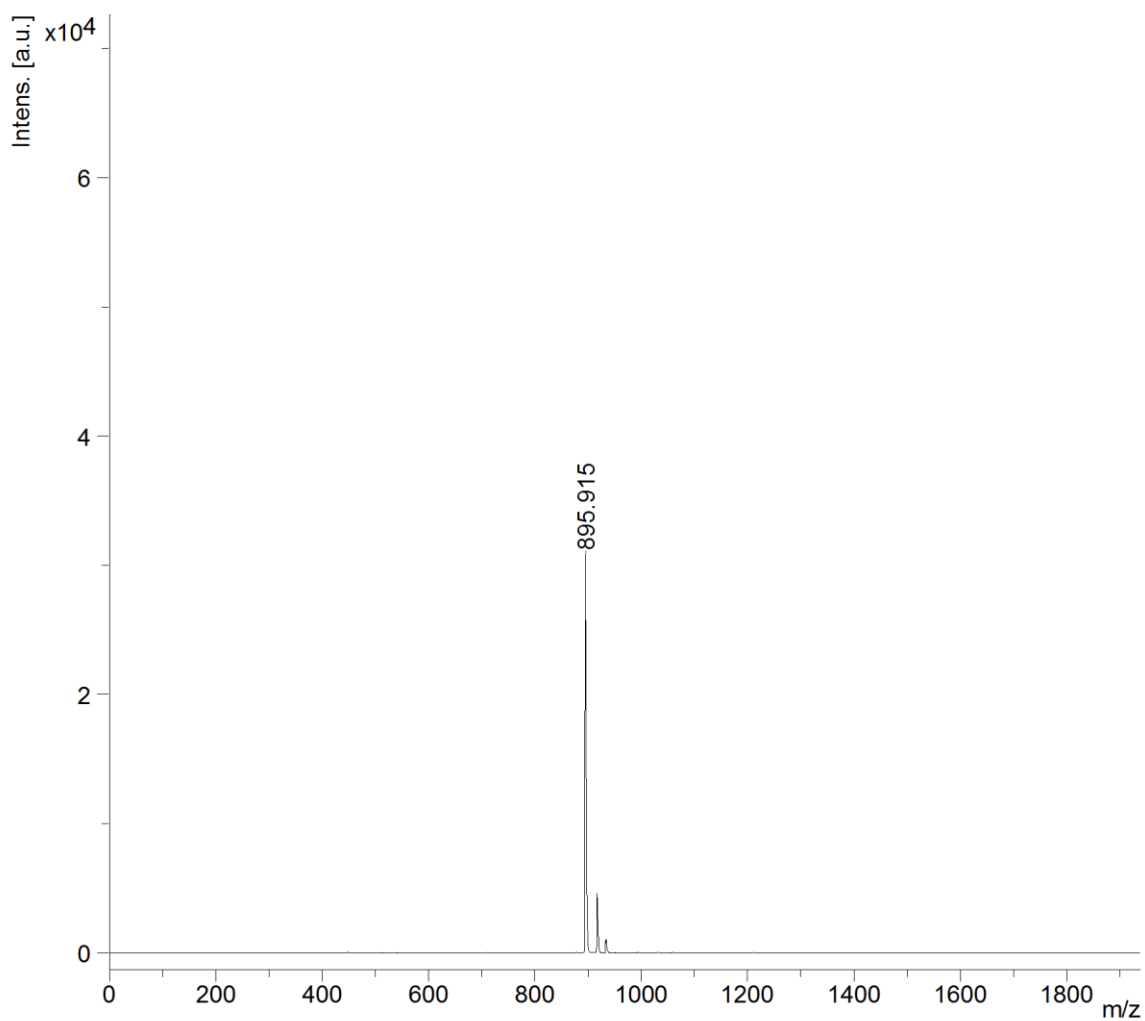

**Figure S29a.** Control MALDI-TOF mass spectra of **P18** for enzymatic action study. Calc.  $(M+2H)^+ = 895.6902\text{Da}$ ; Obs.  $(M+2H)^+ = 895.915\text{ Da}$ .

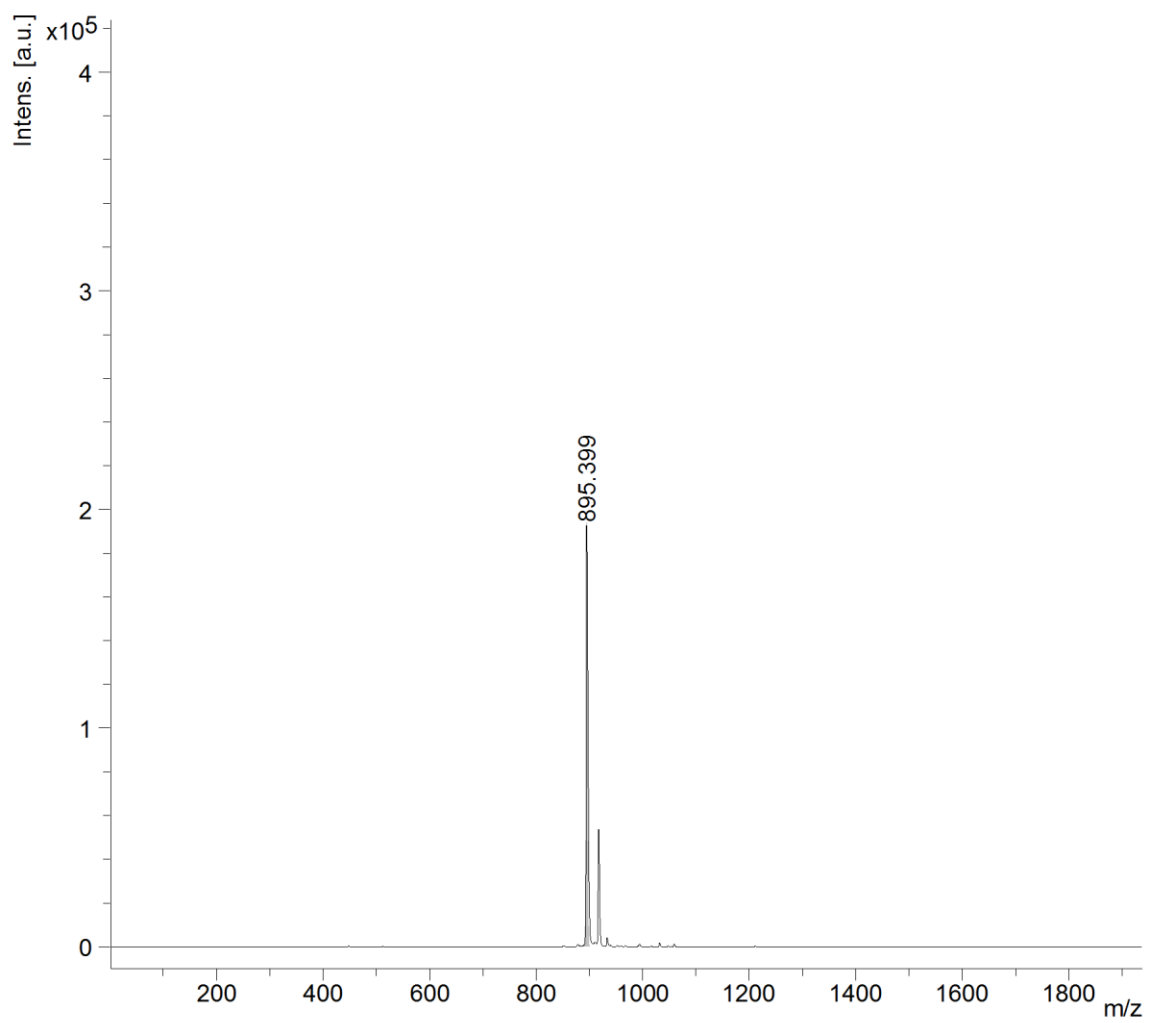

**Figure S29b.** MALDI-TOF mass spectra of **P18** in presence of proteinase K at 15 min. Calc.  $(M+2H)^+ = 895.6902$  Da; Obs.  $(M+2H)^+ = 895.399$  Da.

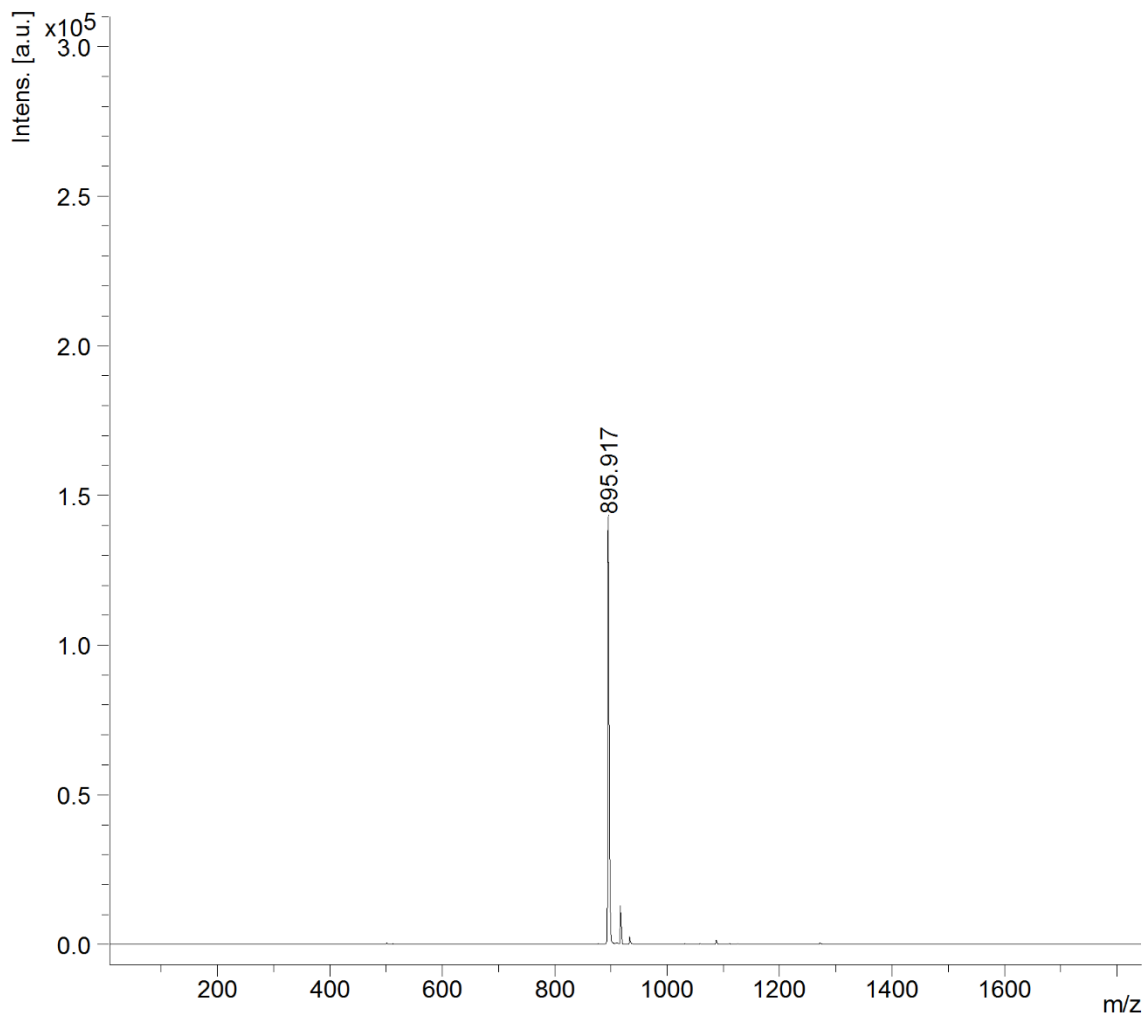

**Figure S29c.** MALDI-TOF mass spectra of **P18** in presence of proteinase K at 1 hr. Calc.  $(M+2H)^+ = 895.6902$  Da; Obs.  $(M+2H)^+ = 895.917$  Da.

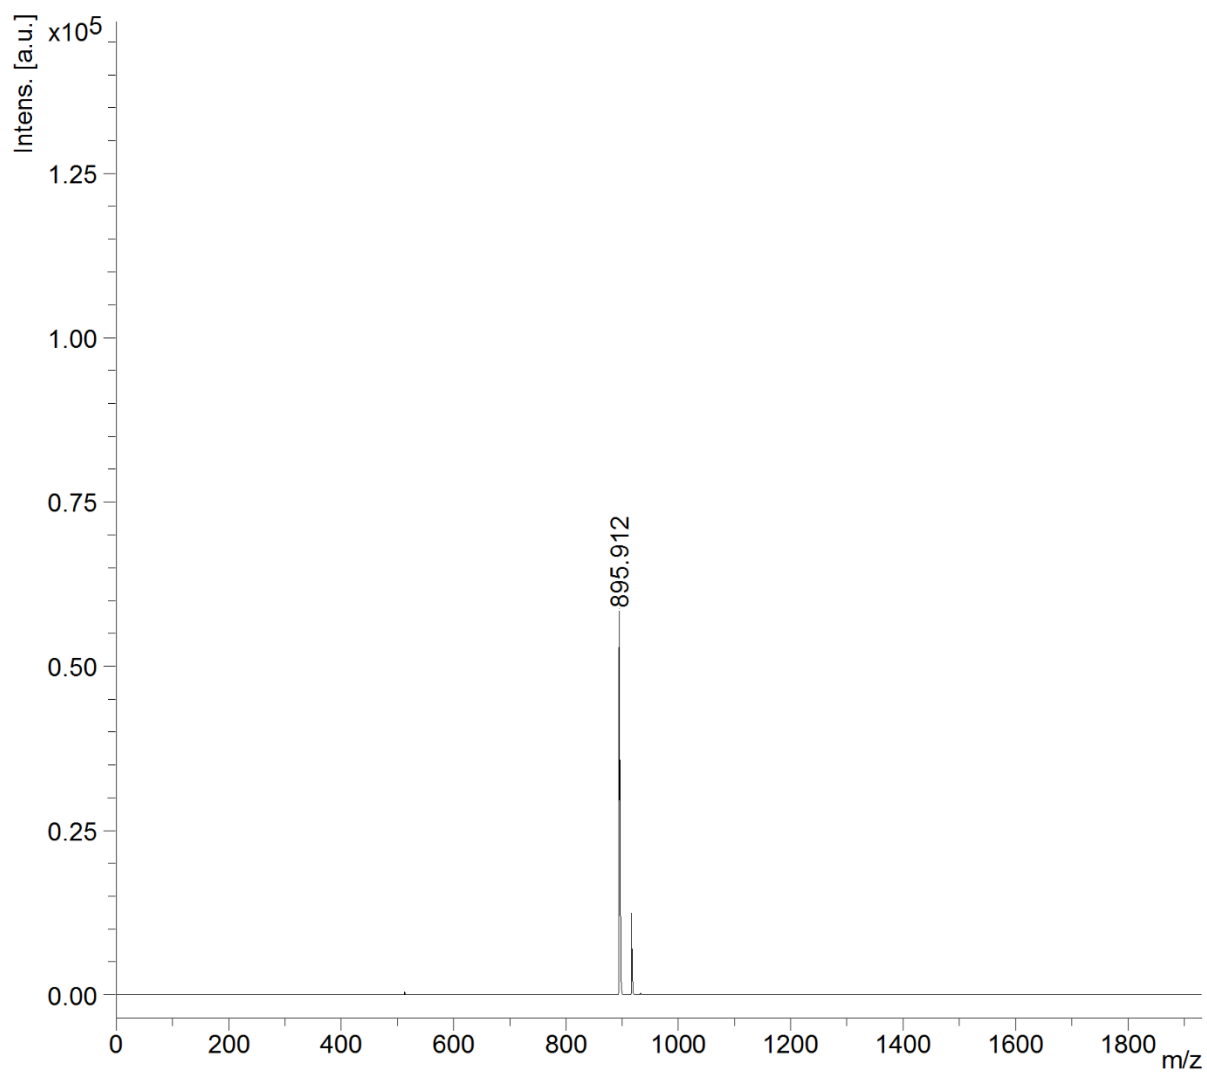

**Figure S29d.** MALDI-TOF mass spectra of **P18** in presence of proteinase **K** at 3 hr. Calc.  $(M+2H)^+ = 895.6902$  Da; Obs.  $(M+2H)^+ = 895.912$  Da.

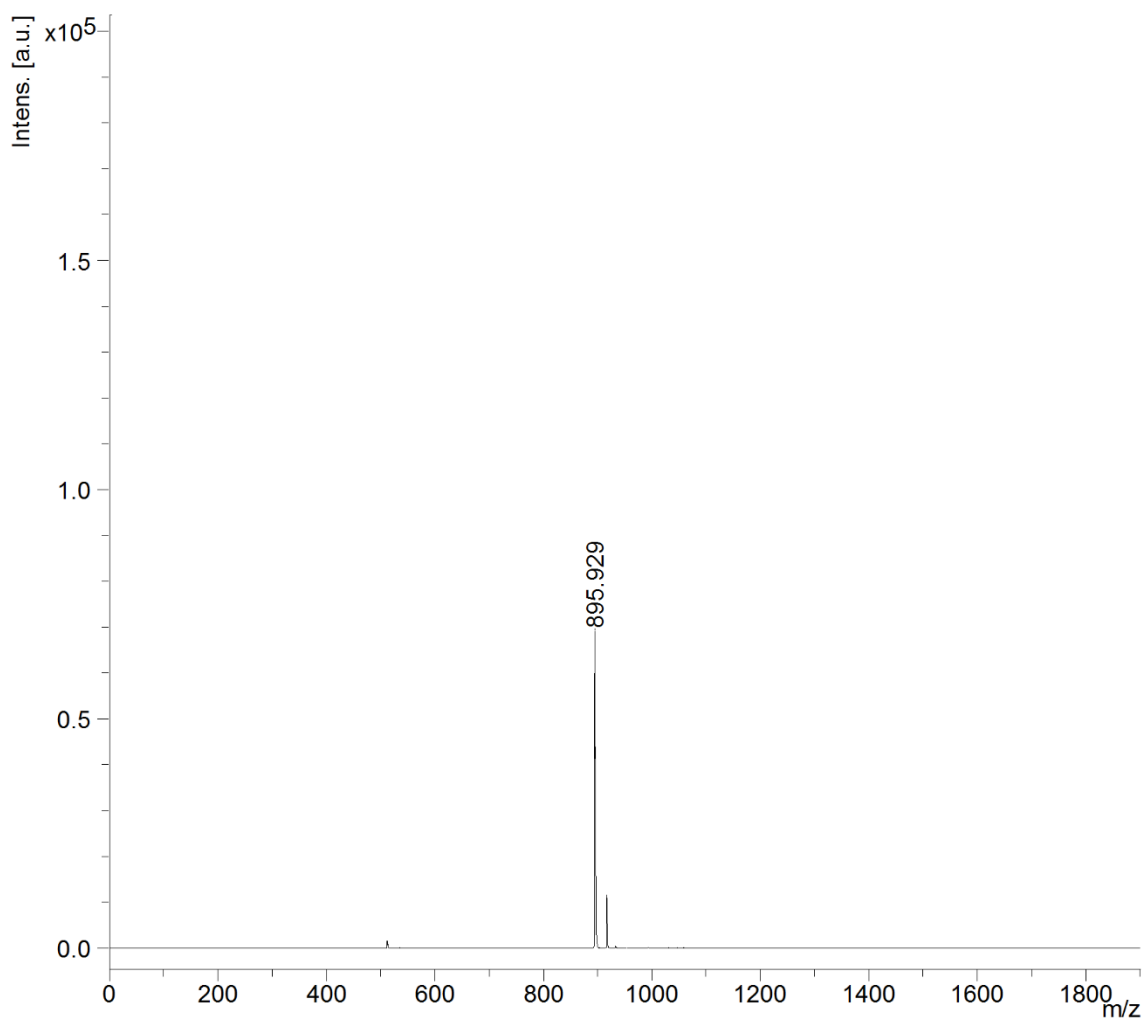

**Figure S29e.** MALDI-TOF mass spectra of **P18** in presence of proteinase K at 6 hr. Calc.  $(M+2H)^+ = 895.6902$  Da; Obs.  $(M+2H)^+ = 895.929$  Da.

**Table S1.**  $2\theta$  and d-spacing values from PXRD

| Peptides                    | P8    | P10   | P12   | P14   | P16    | P18  |
|-----------------------------|-------|-------|-------|-------|--------|------|
| <b>2<math>\theta</math></b> | 20.75 | 20.88 | 20.96 | 21.78 | 23.028 | 23.7 |
| <b>d spacing (Å)</b>        | 4.27  | 4.24  | 4.241 | 4.07  | 3.85   | 3.8  |
